# Supplementary material
Source: ML conference proceedings conference paper supplement (https://openreview.net/forum?id=DyB3m95eCV)

# viz hypothesis symmetry text instruction

Layer 4

Qwen2.5 1.5B Instruct

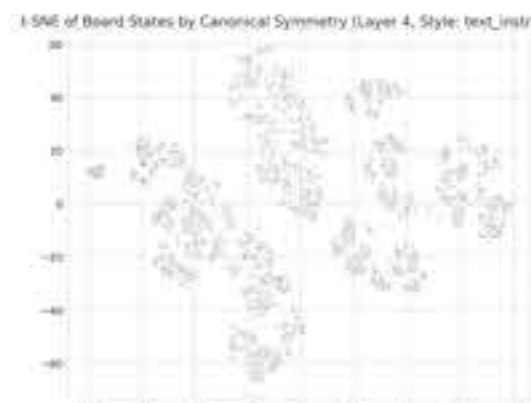

GRPO  
Best Move (Base)  
Ckpt 600

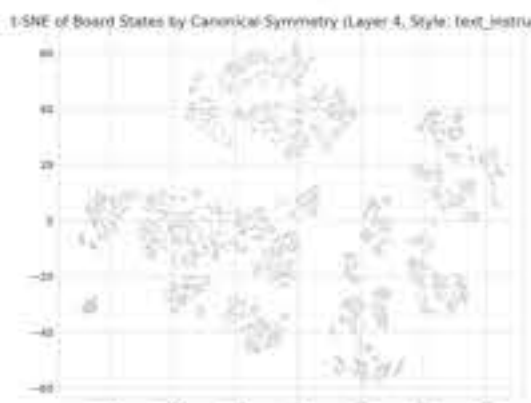

GRPO  
Best Move (Base)  
Ckpt 1200

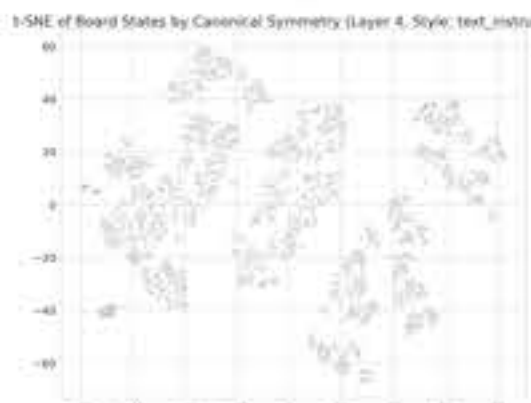

GRPO  
Best Move (Base)

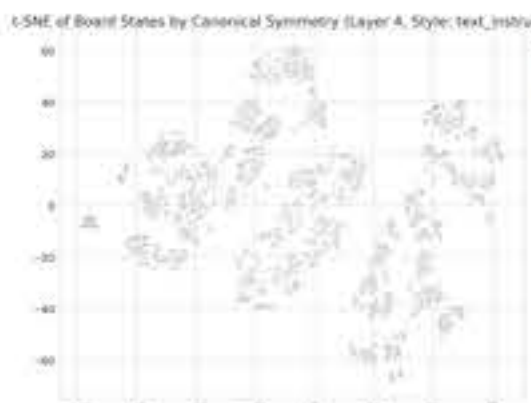

Layer 8

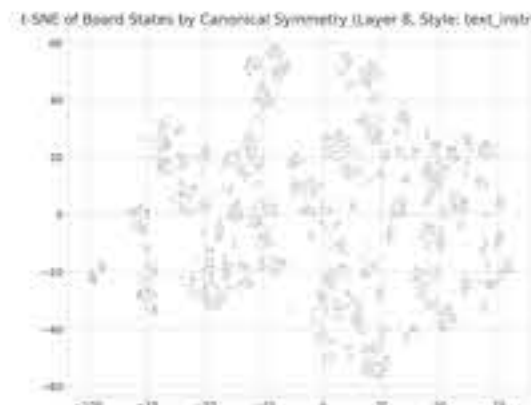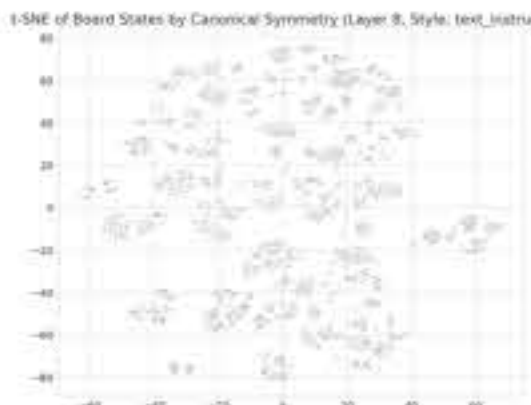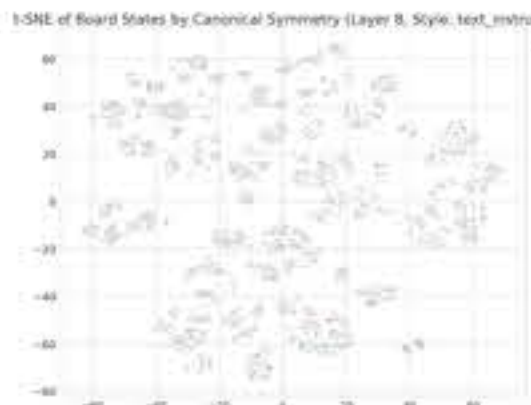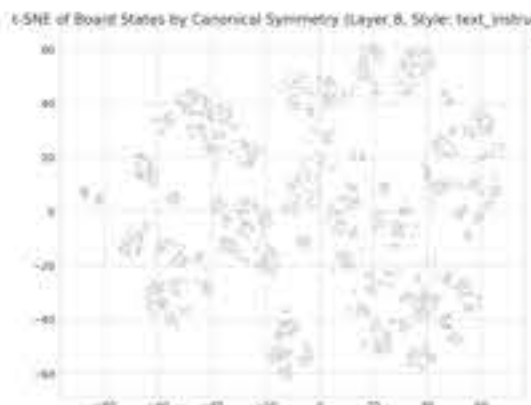

Layer 12

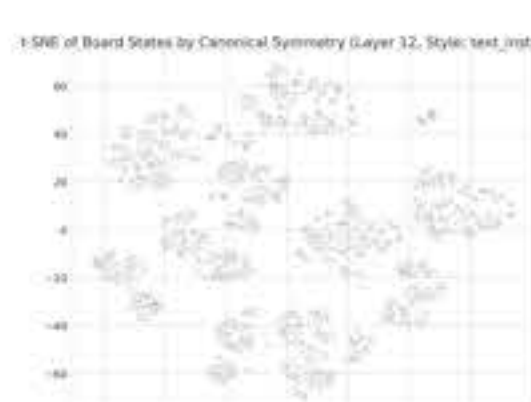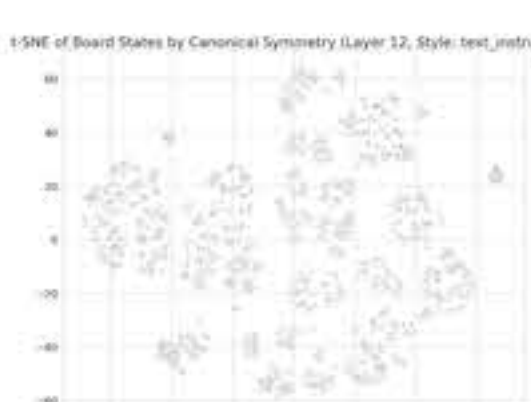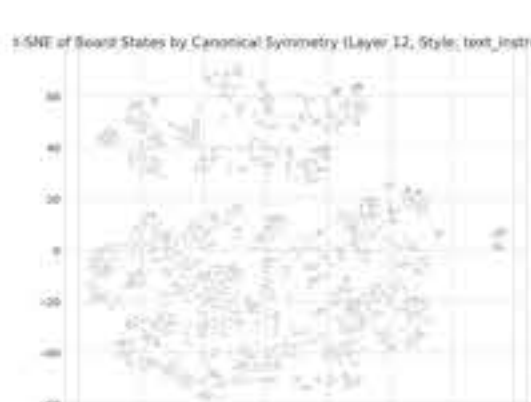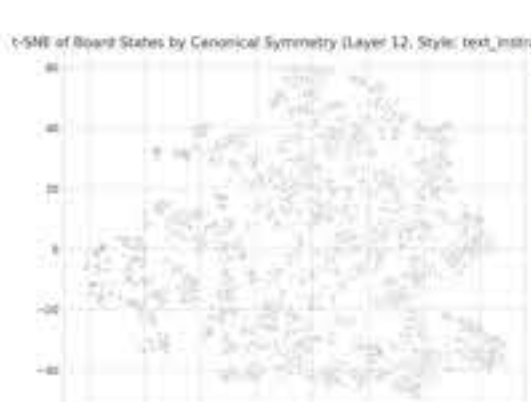

Layer 13

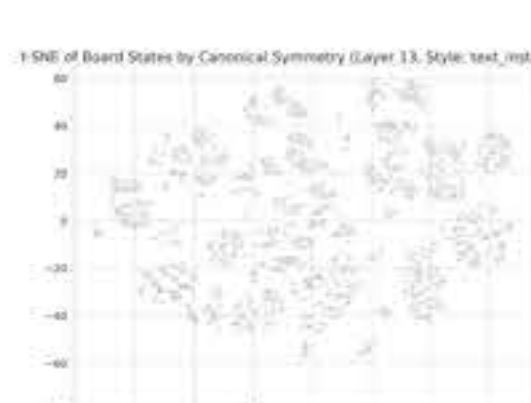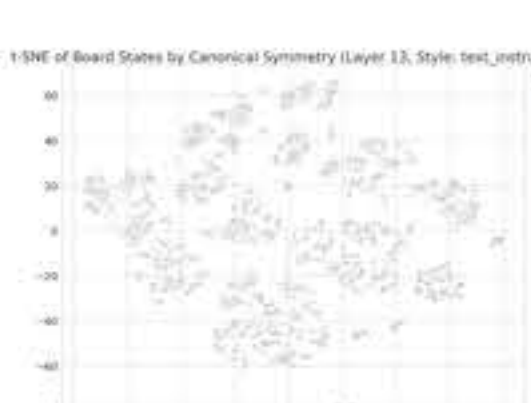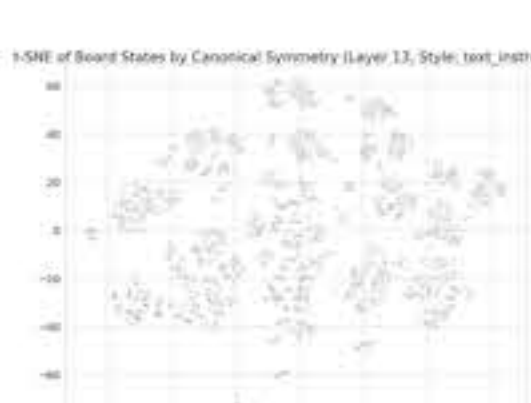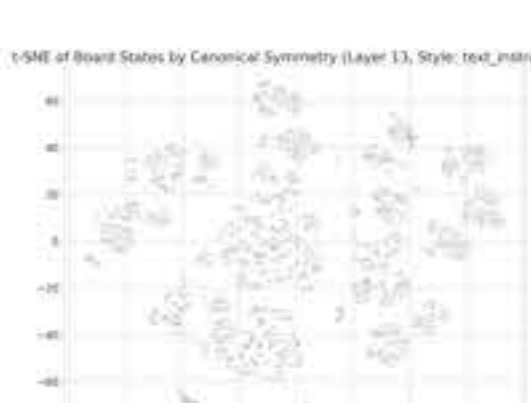

Layer 14

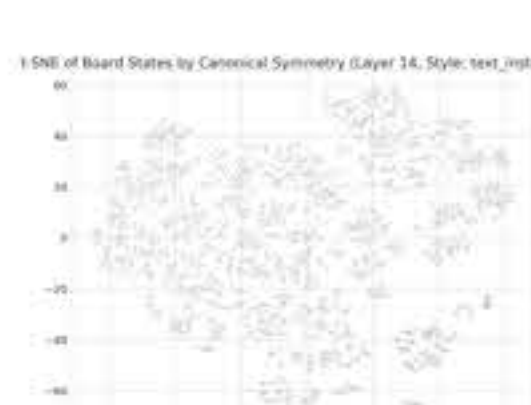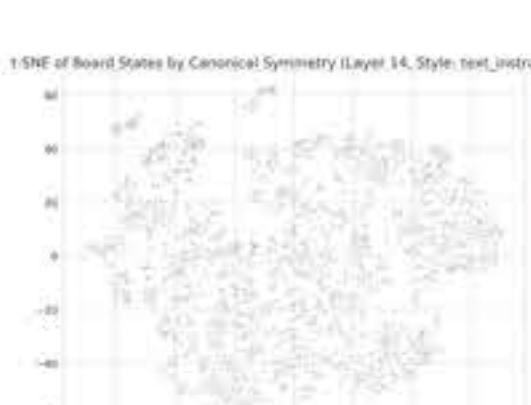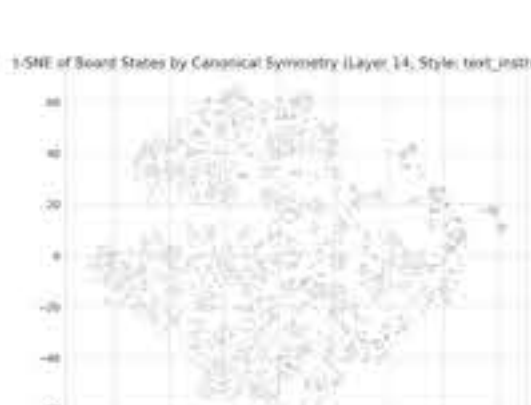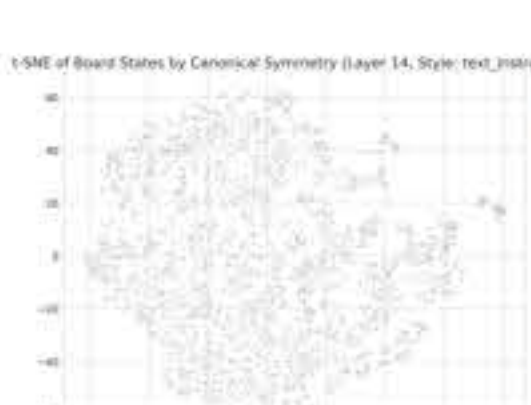

Layer 15

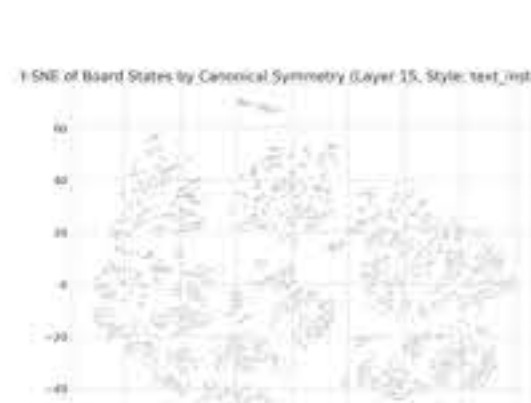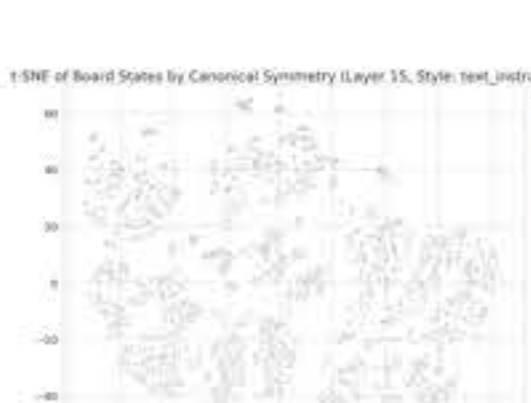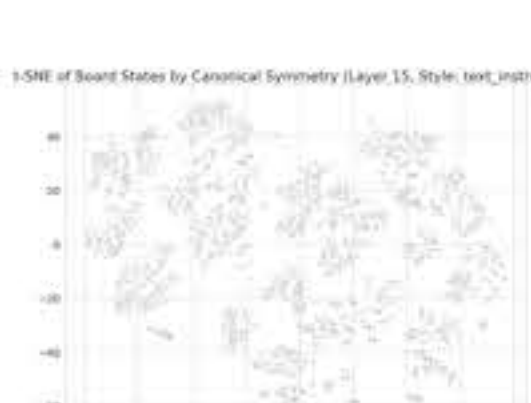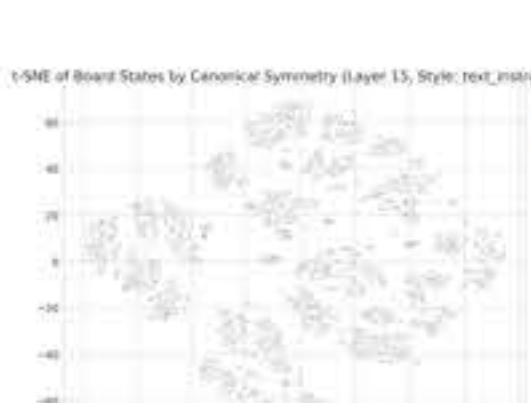

Layer 16

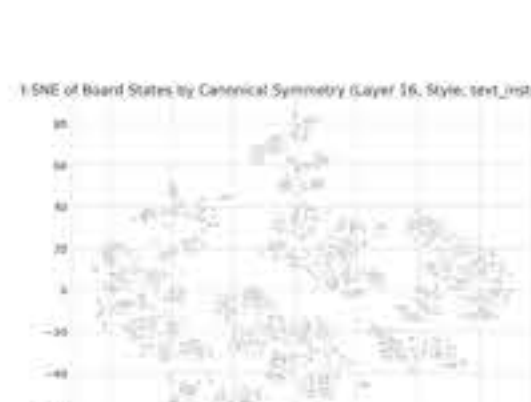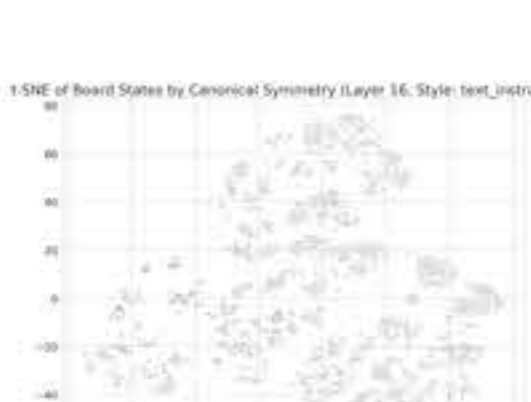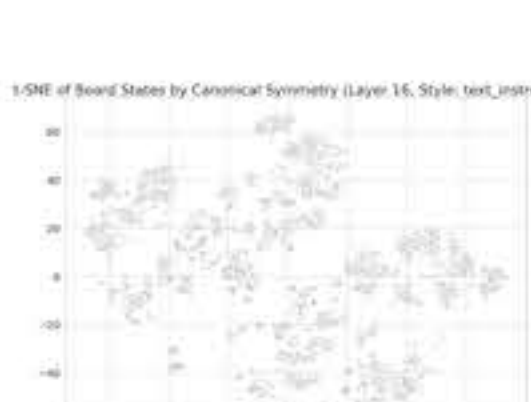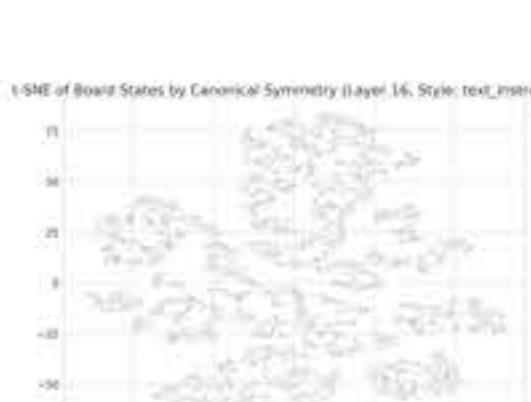

Layer 17

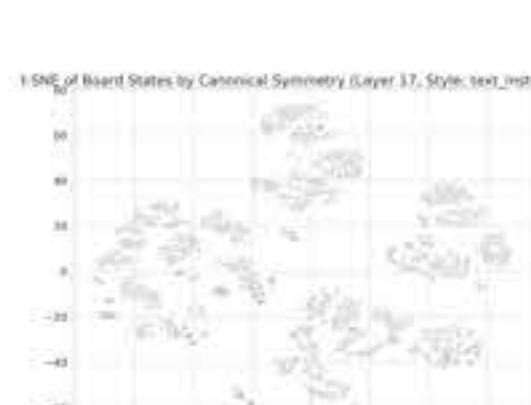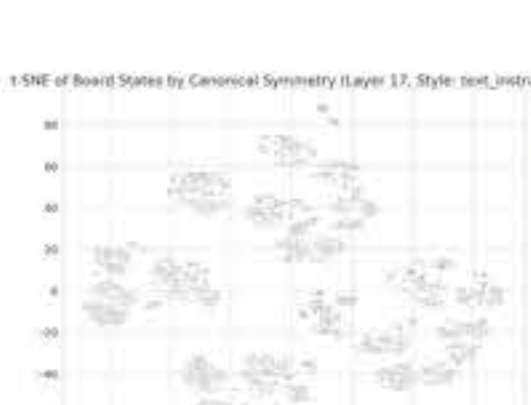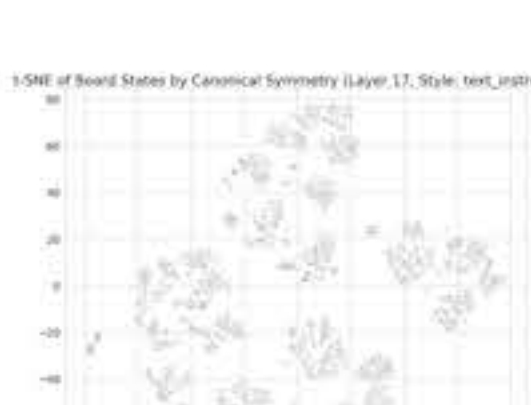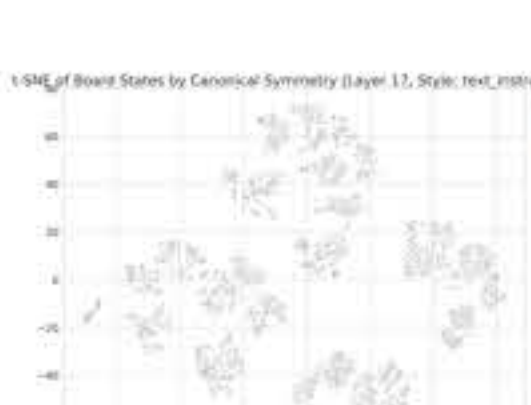

Layer 18

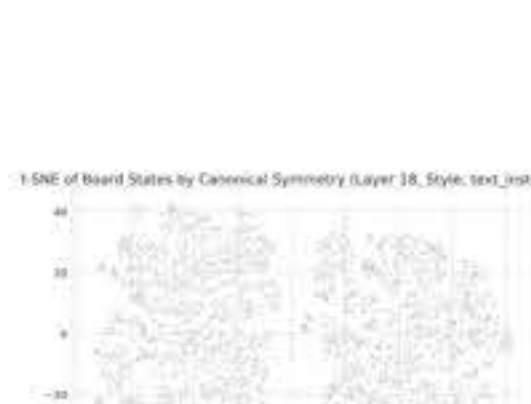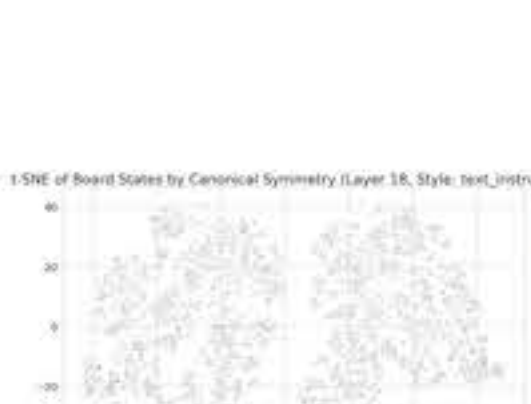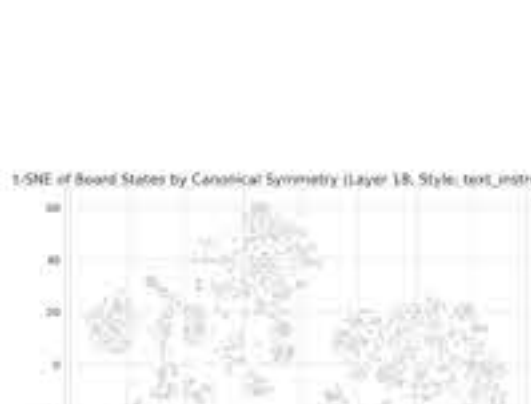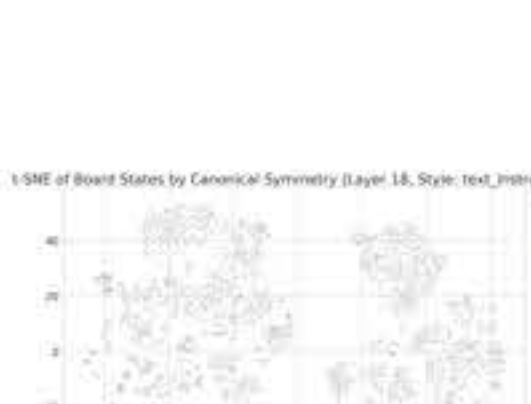

Layer 20

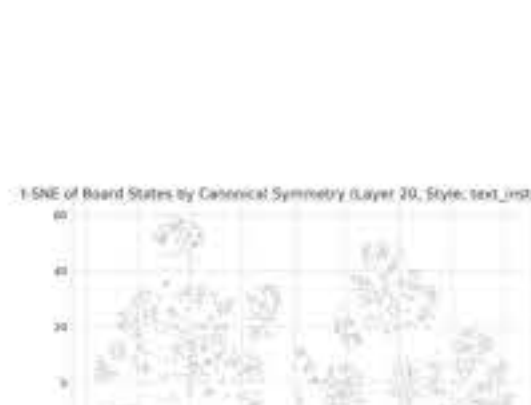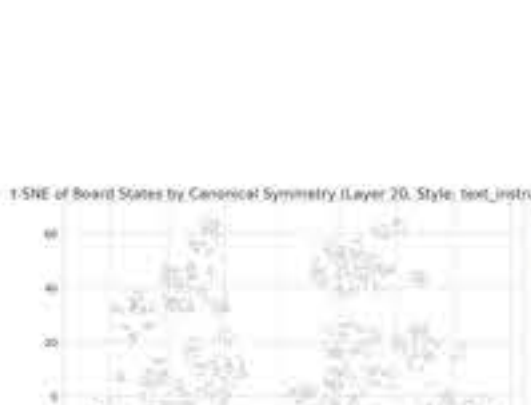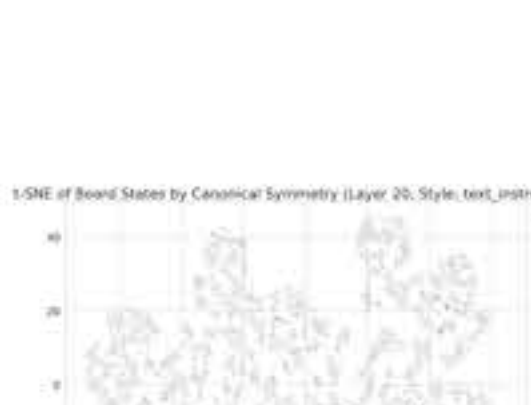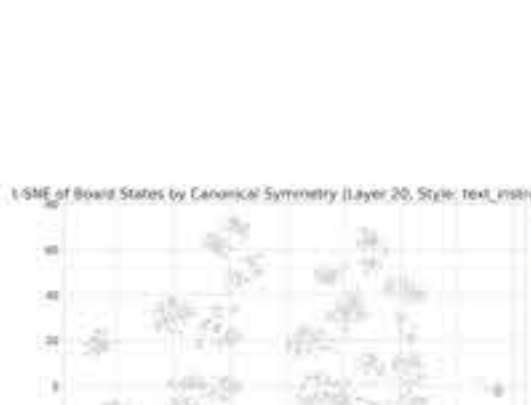

Layer 24

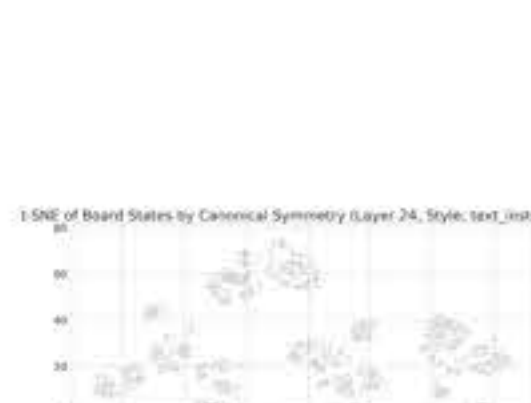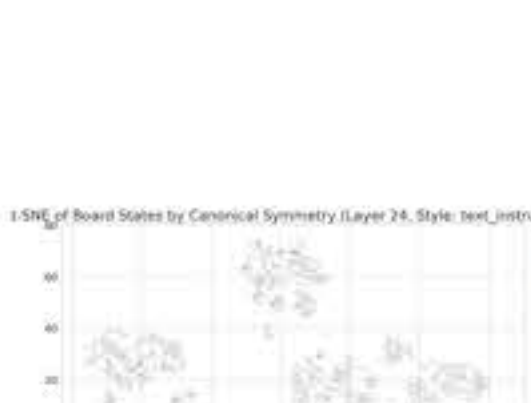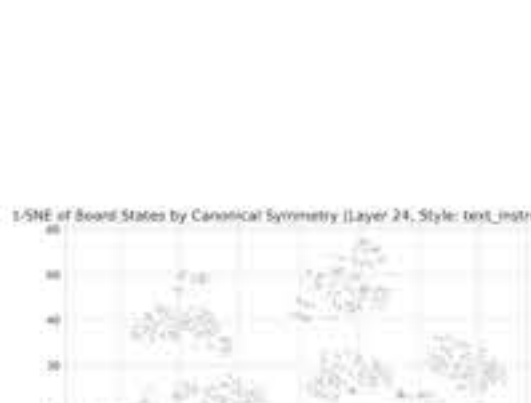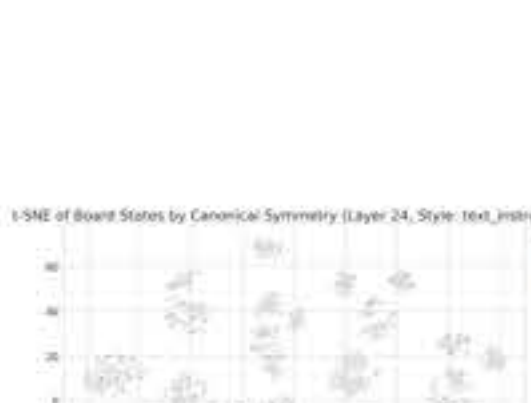

Supplement: supplementary_material [file comparison_viz_hypothesis_symmetry_text_instruction-compressed.pdf › supplemental/Mech Interp Plots/comparison_viz_hypothesis_symmetry_text_instruction-compressed.pdf]
