# Supplementary material
Source: ML conference proceedings conference paper supplement (https://openreview.net/forum?id=DyB3m95eCV)

## viz hypothesis game progression ascii board

-layer 4

Layer 8

ayer 12

ayer 13

layer 14

-layer 15

-layer 16

layer 17

-layer 18

-layer 20

Layer 24

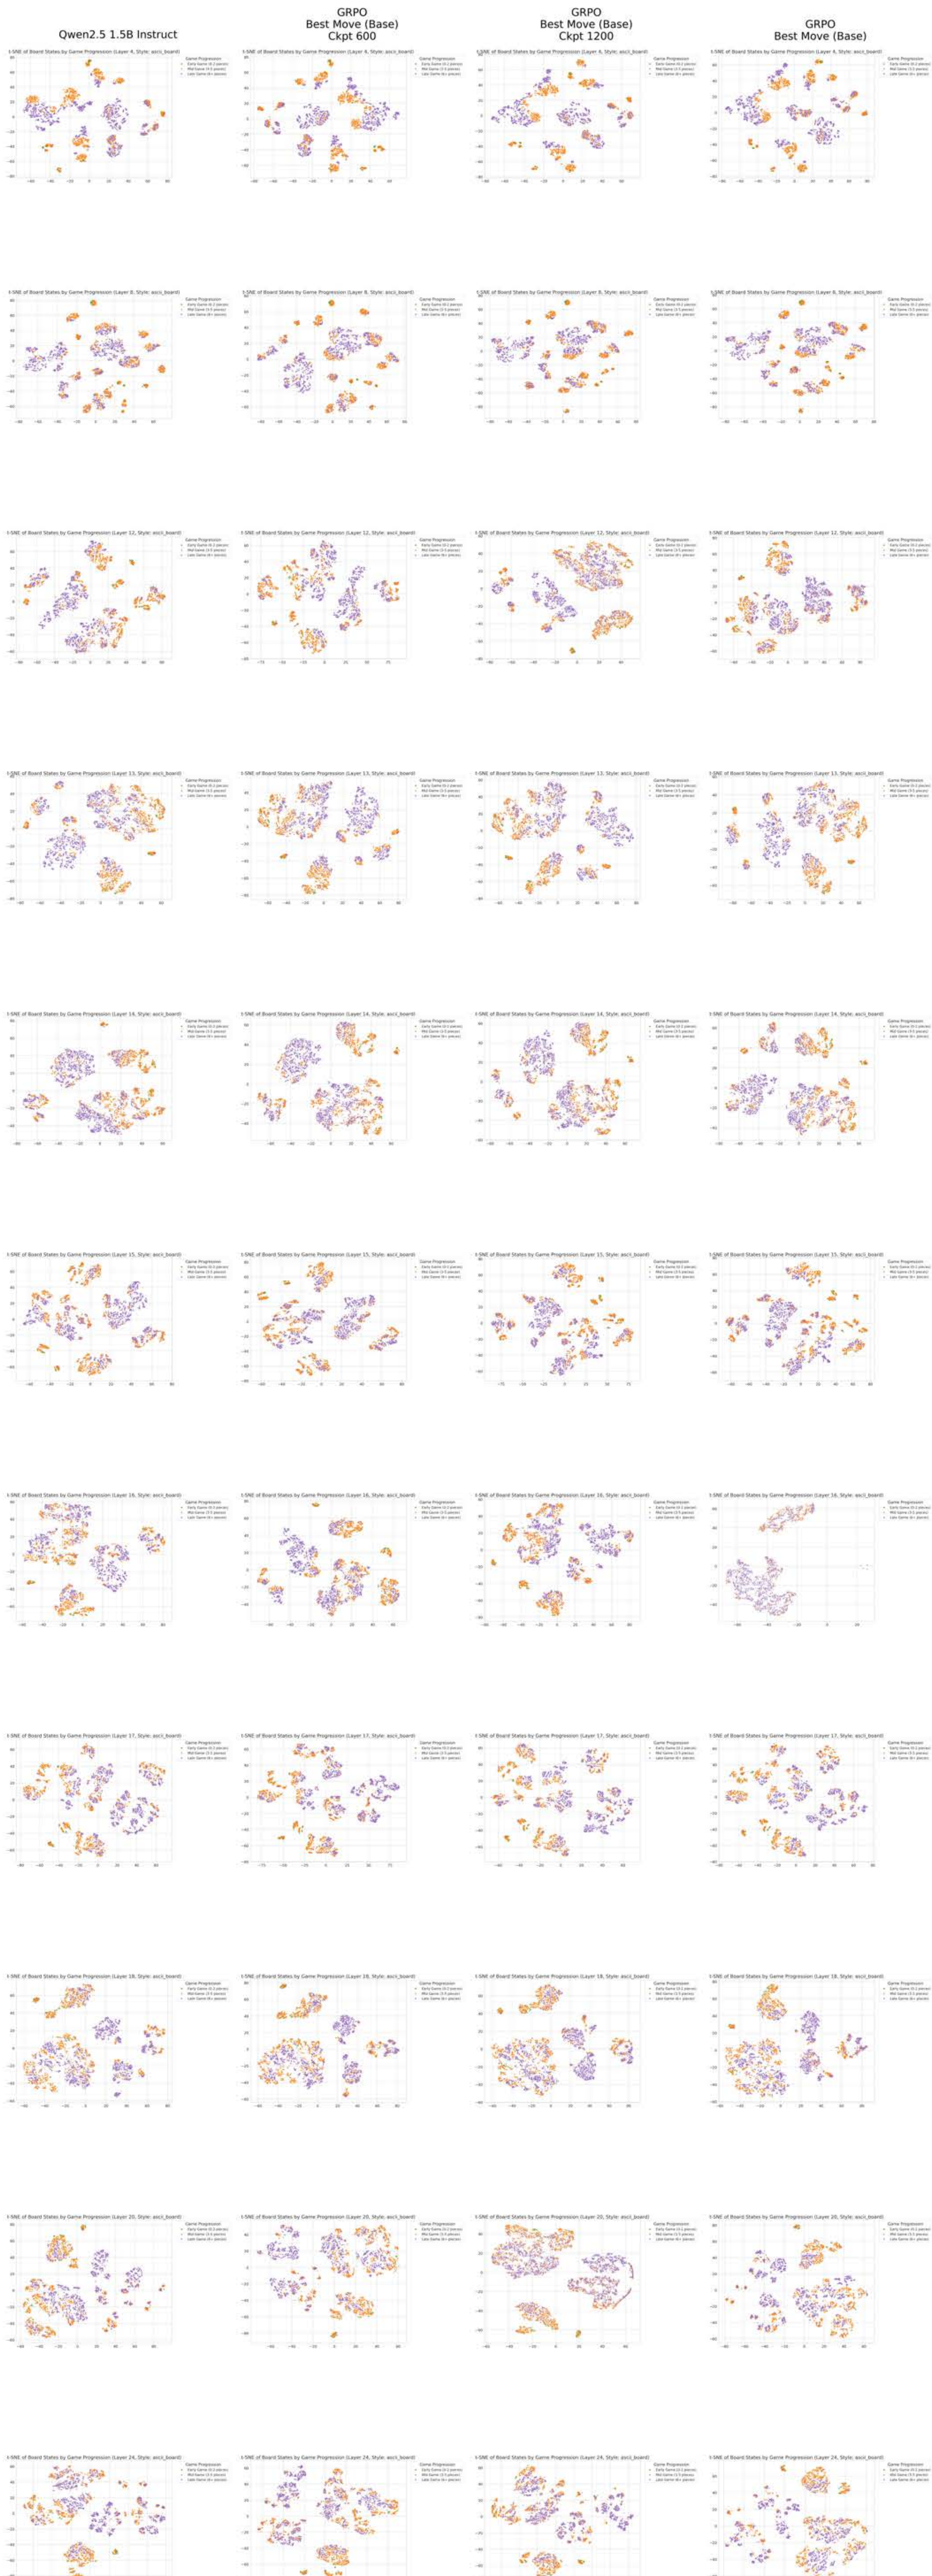

Supplement: supplementary_material [file comparison_viz_hypothesis_game_progression_ascii_board-compressed.pdf › supplemental/Mech Interp Plots/comparison_viz_hypothesis_game_progression_ascii_board-compressed.pdf]
