# Supplementary material
Source: ML conference proceedings conference paper supplement (https://openreview.net/forum?id=DyB3m95eCV)

# viz hypothesis game turn ascii board

Layer 4

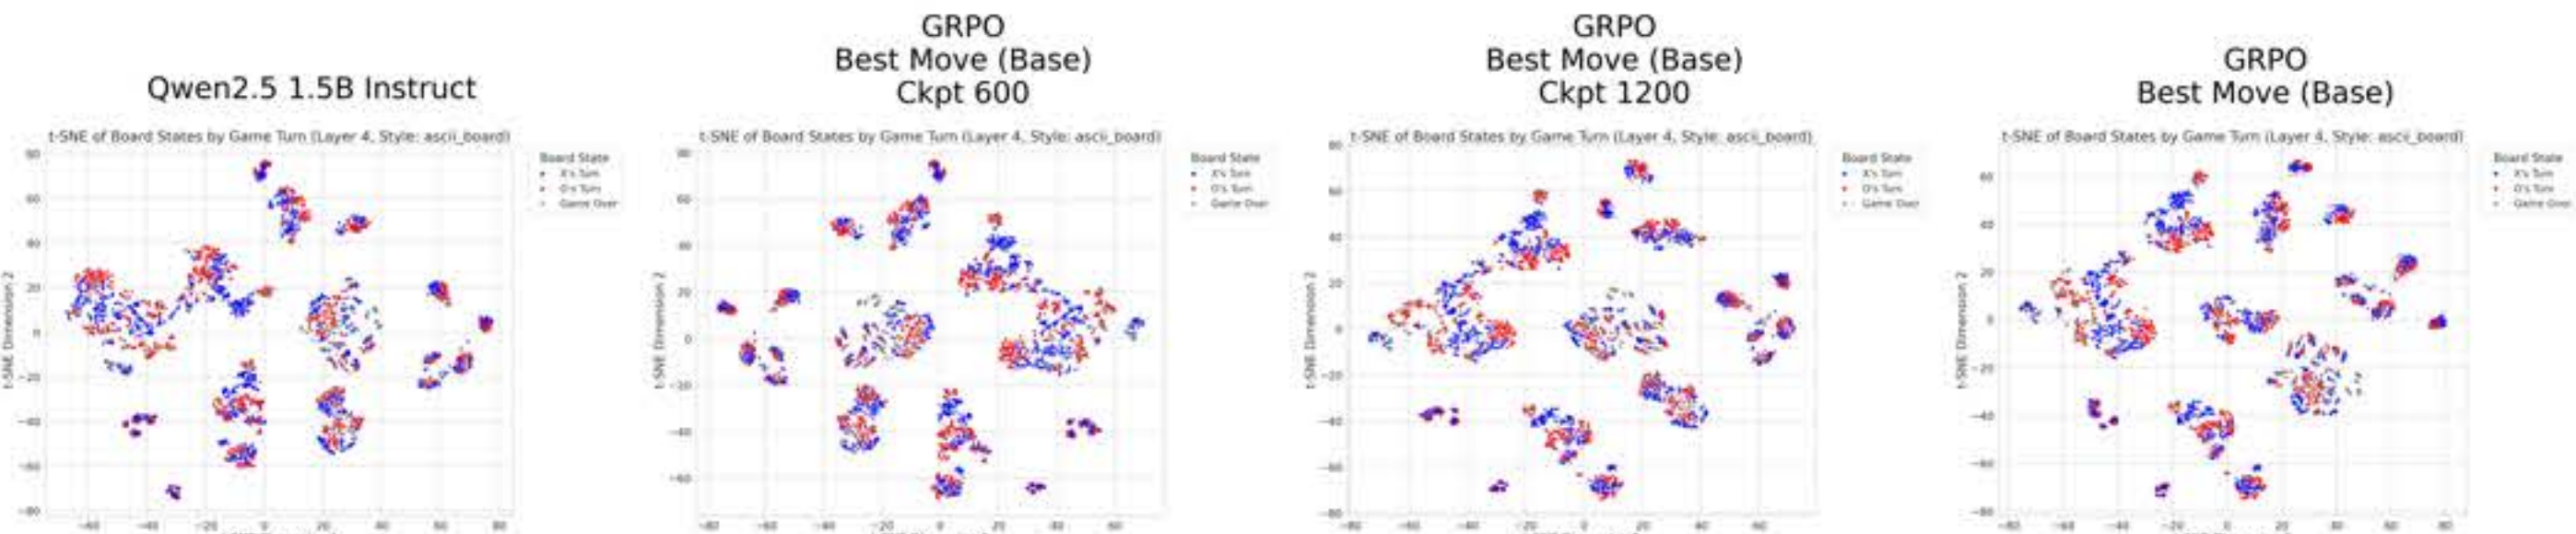

Layer 8

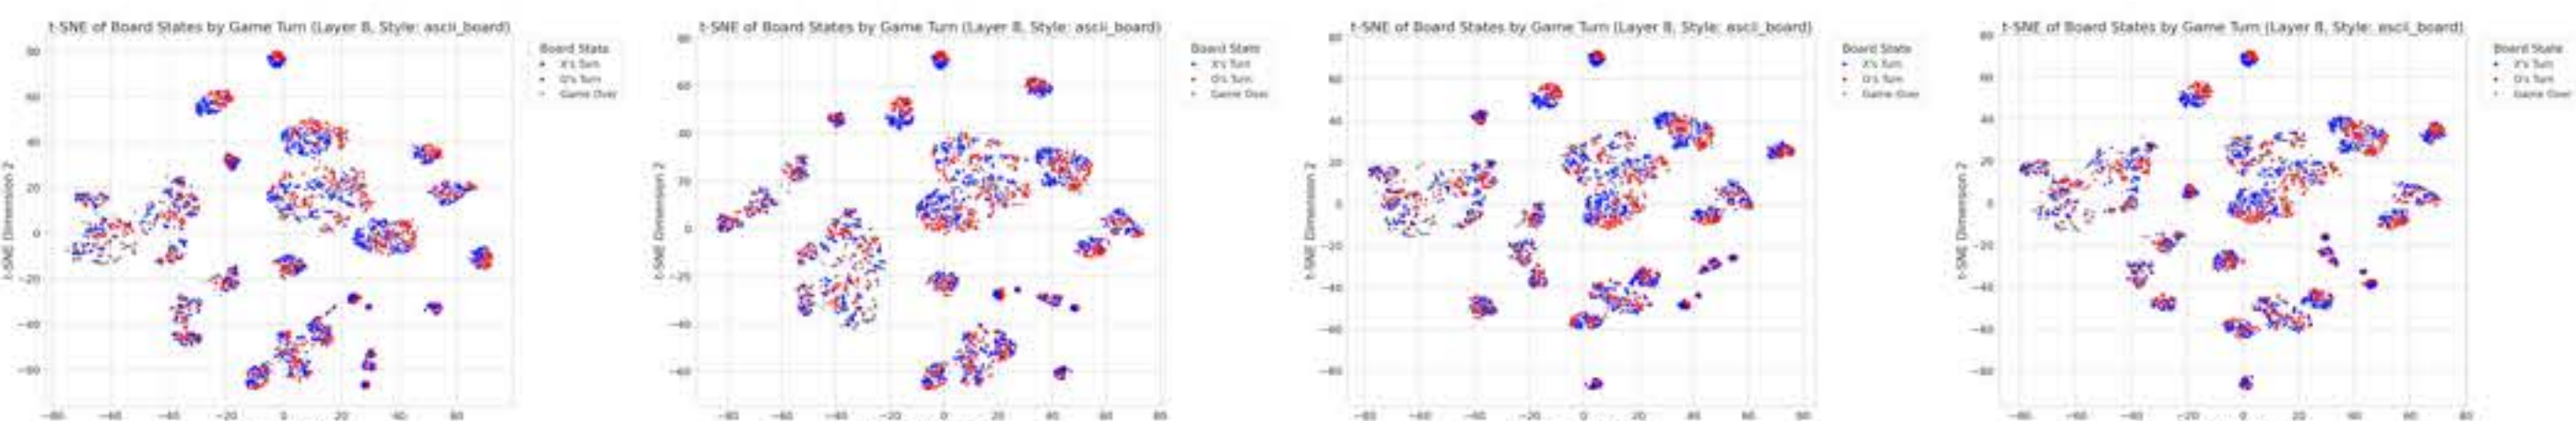

Layer 12

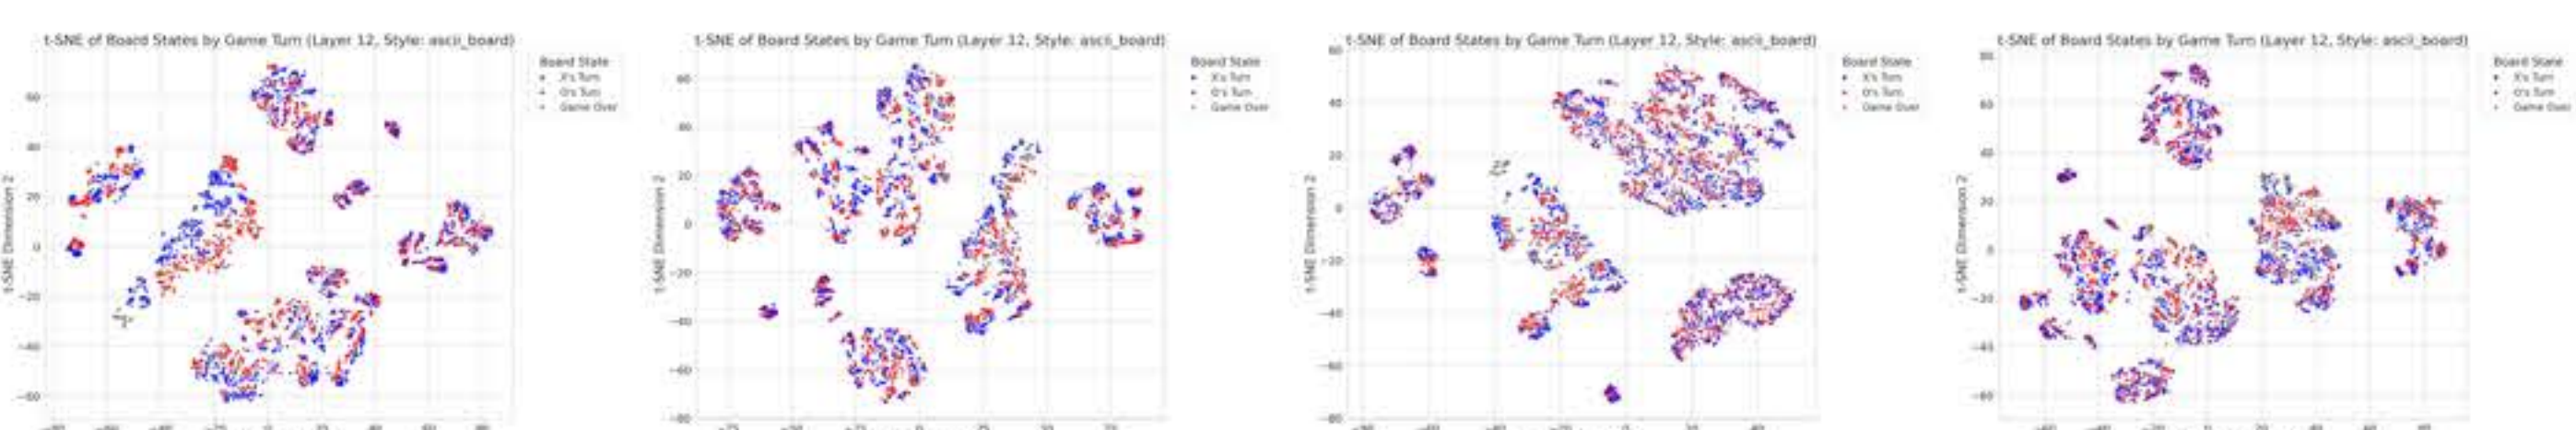

Layer 13

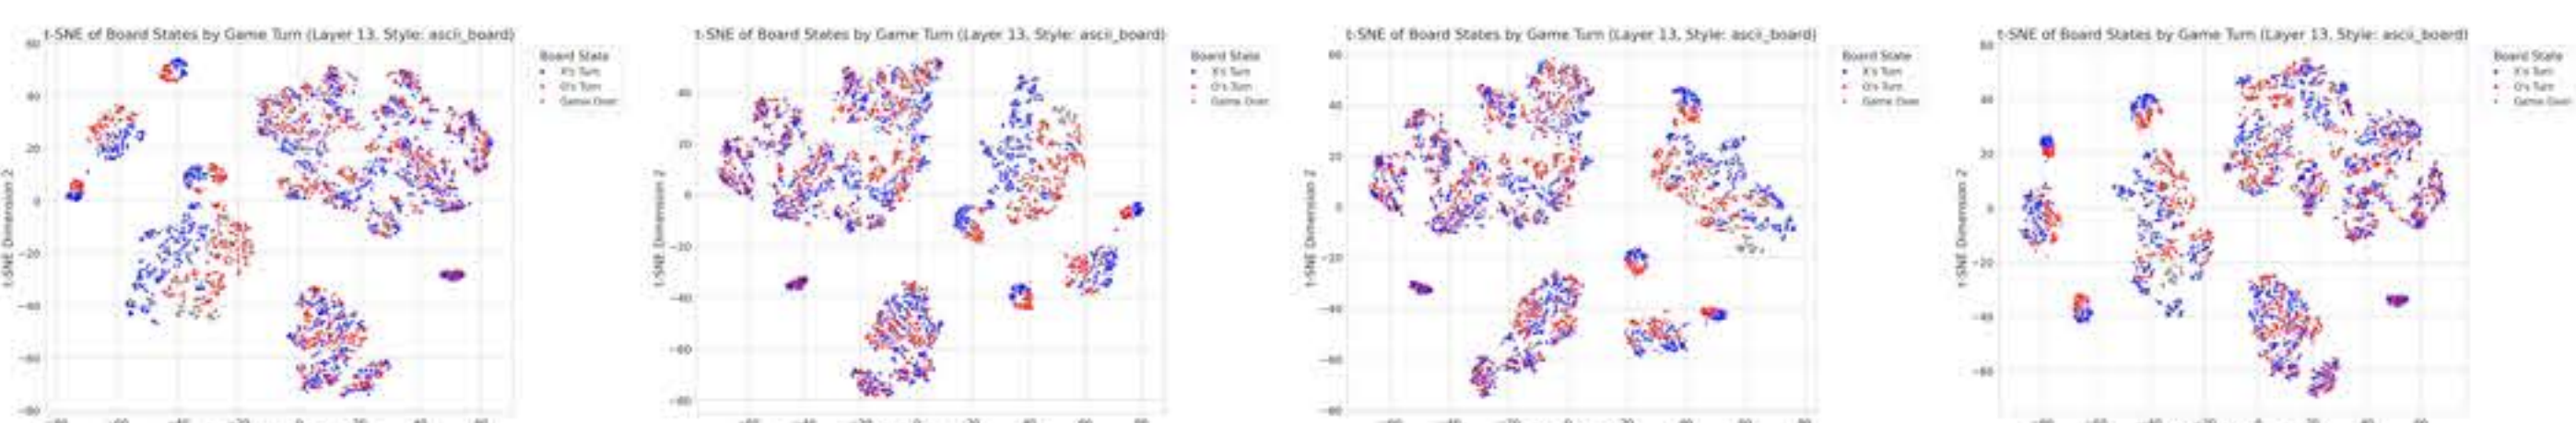

Layer 14

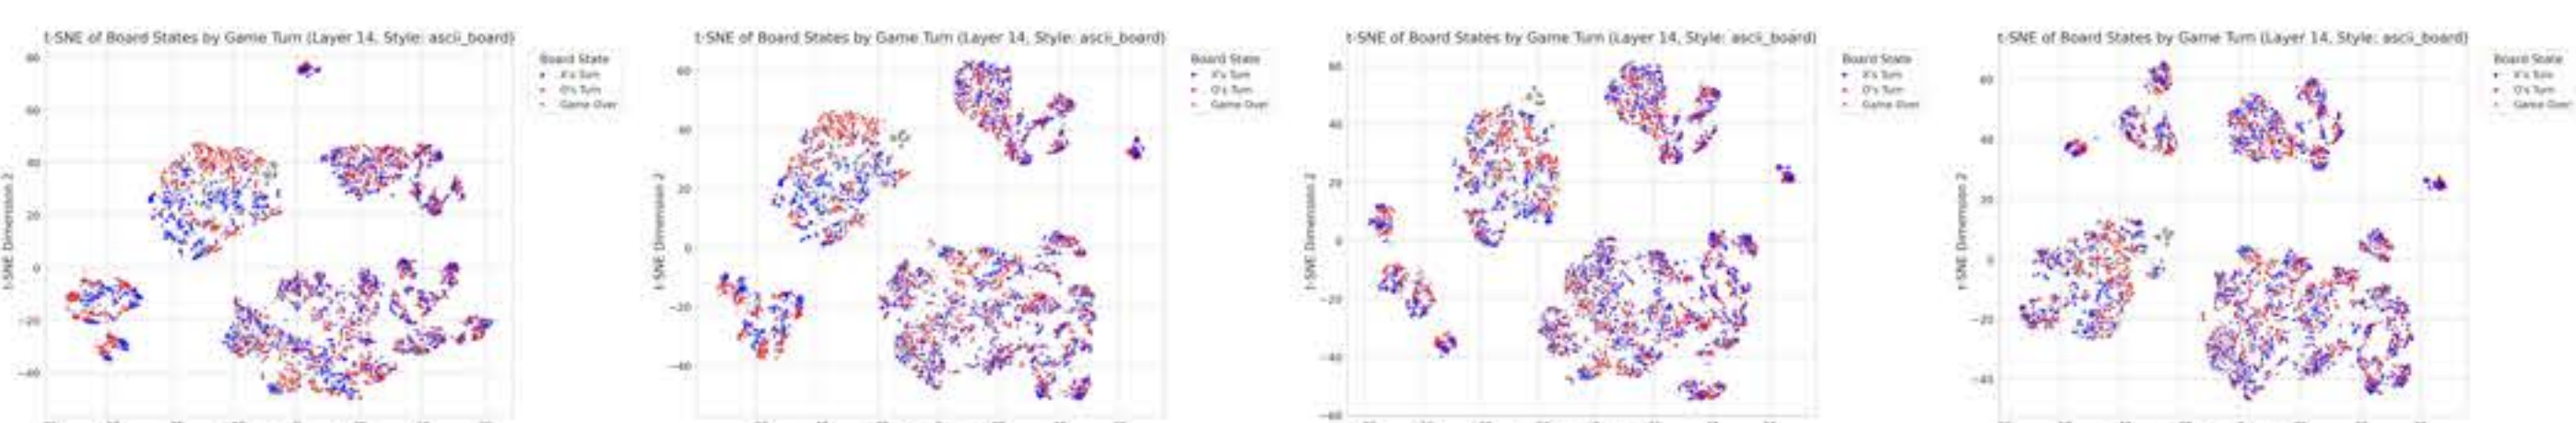

Layer 15

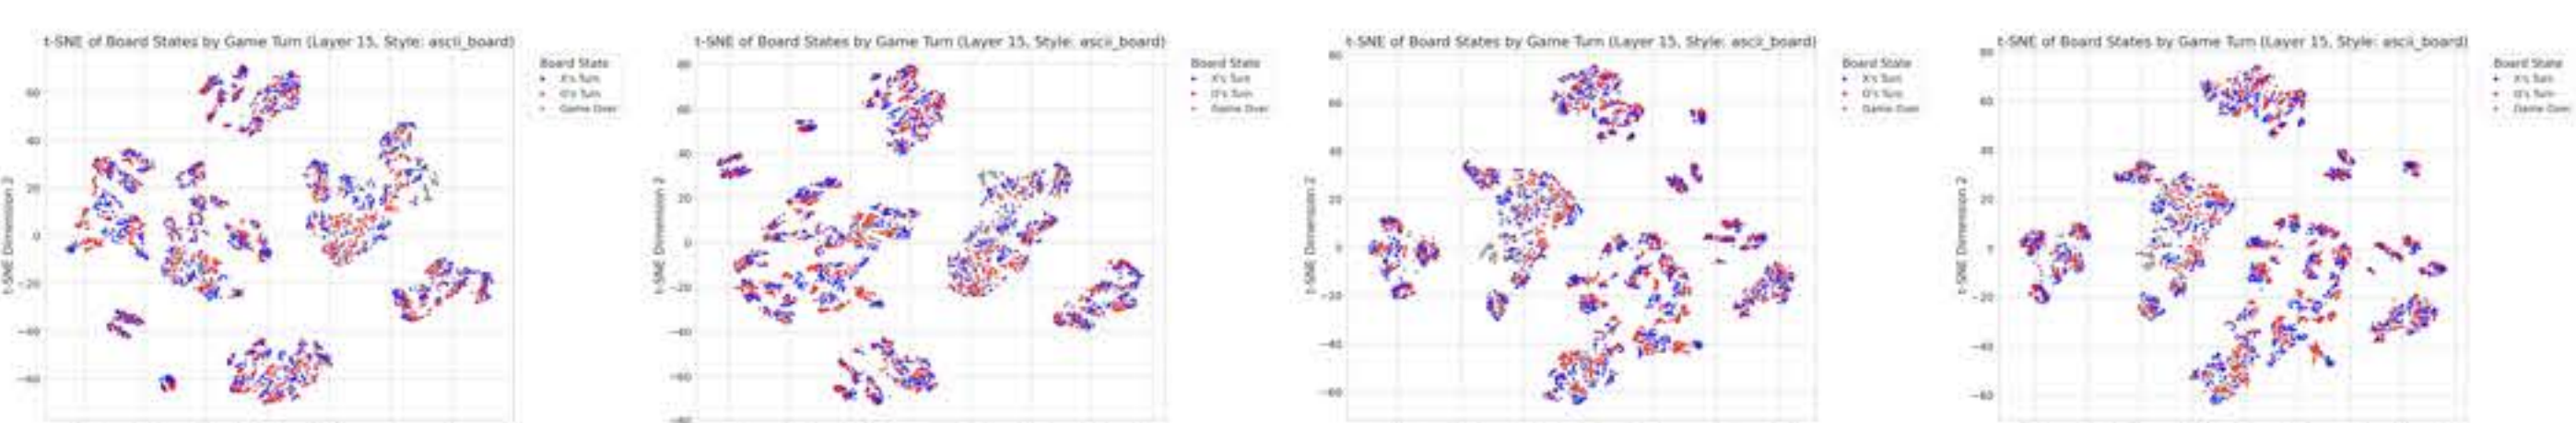

Layer 16

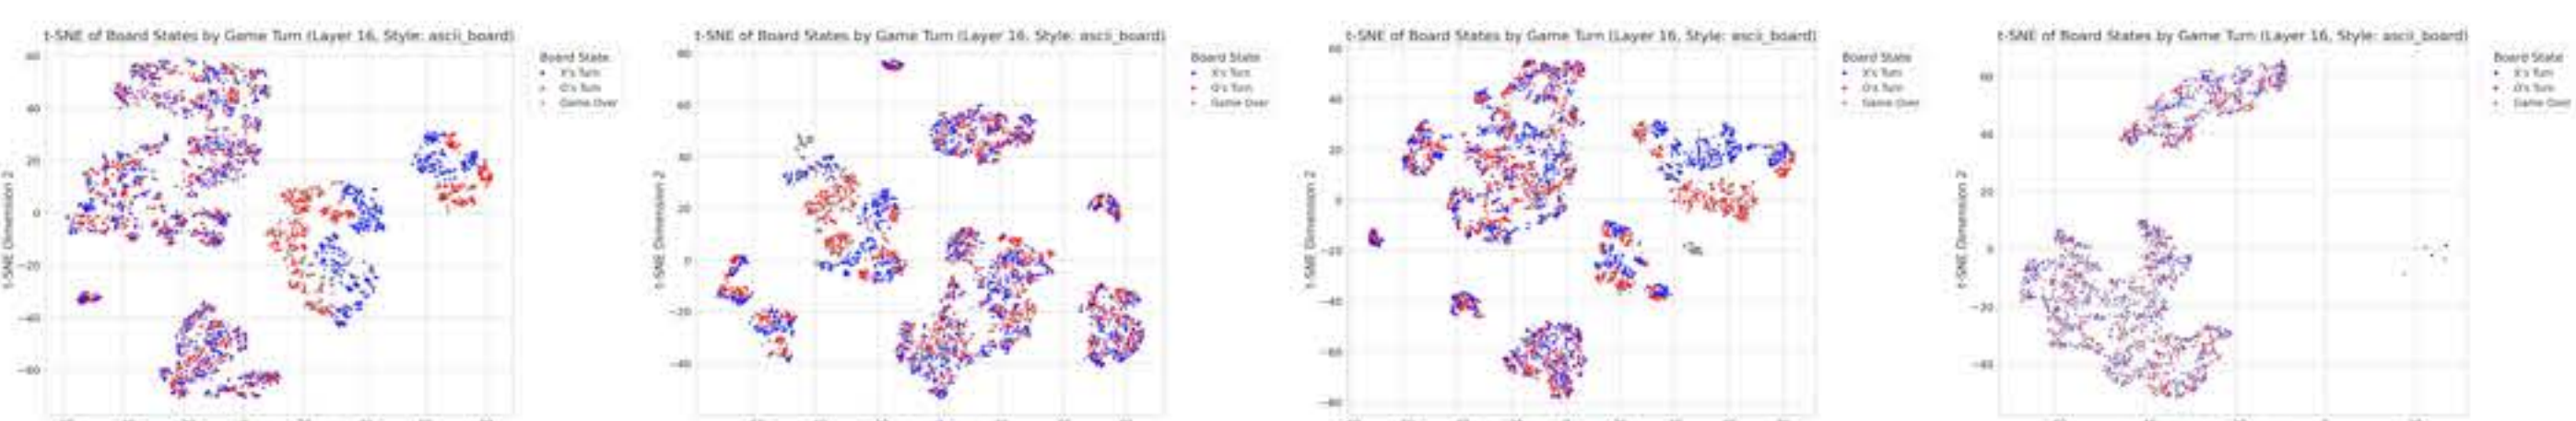

Layer 17

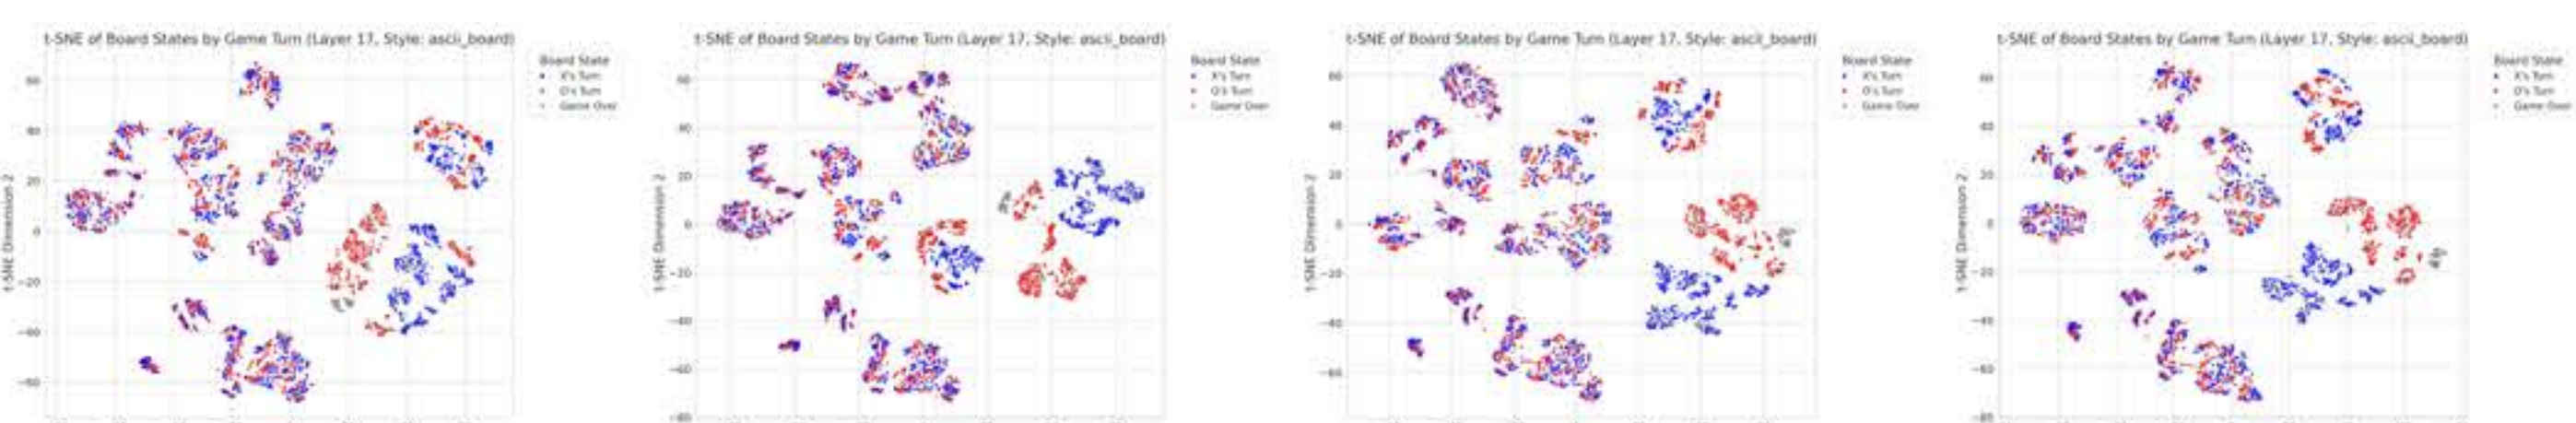

Layer 18

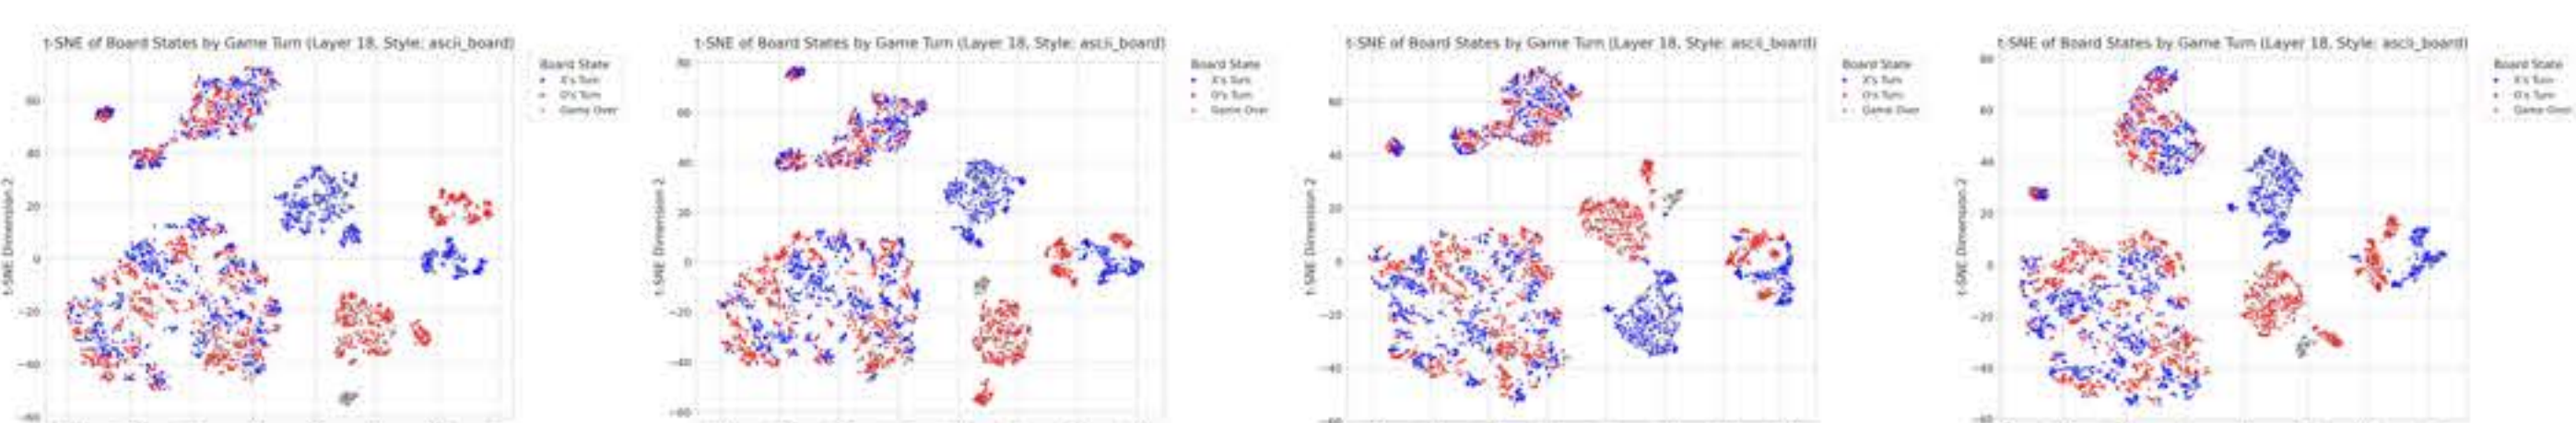

Layer 20

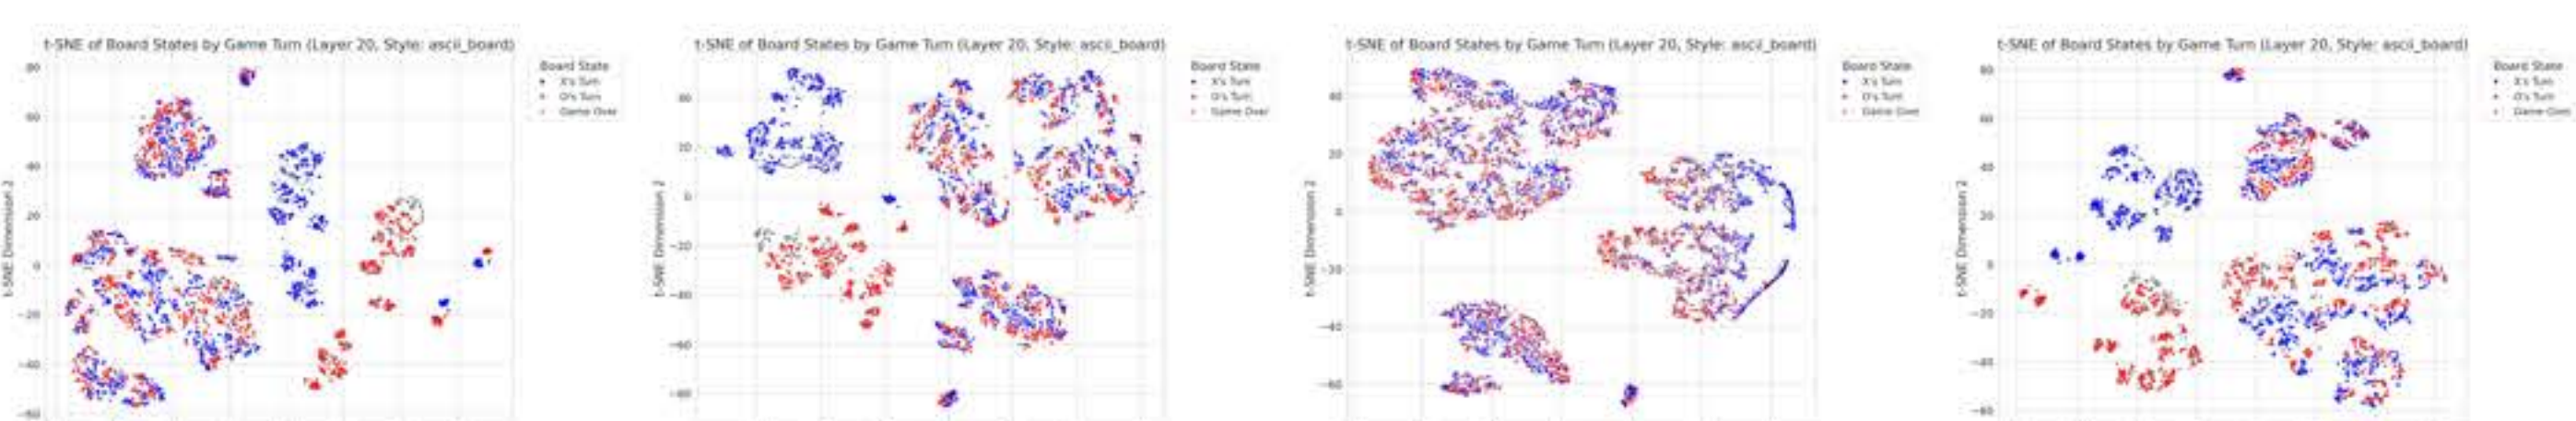

Layer 24

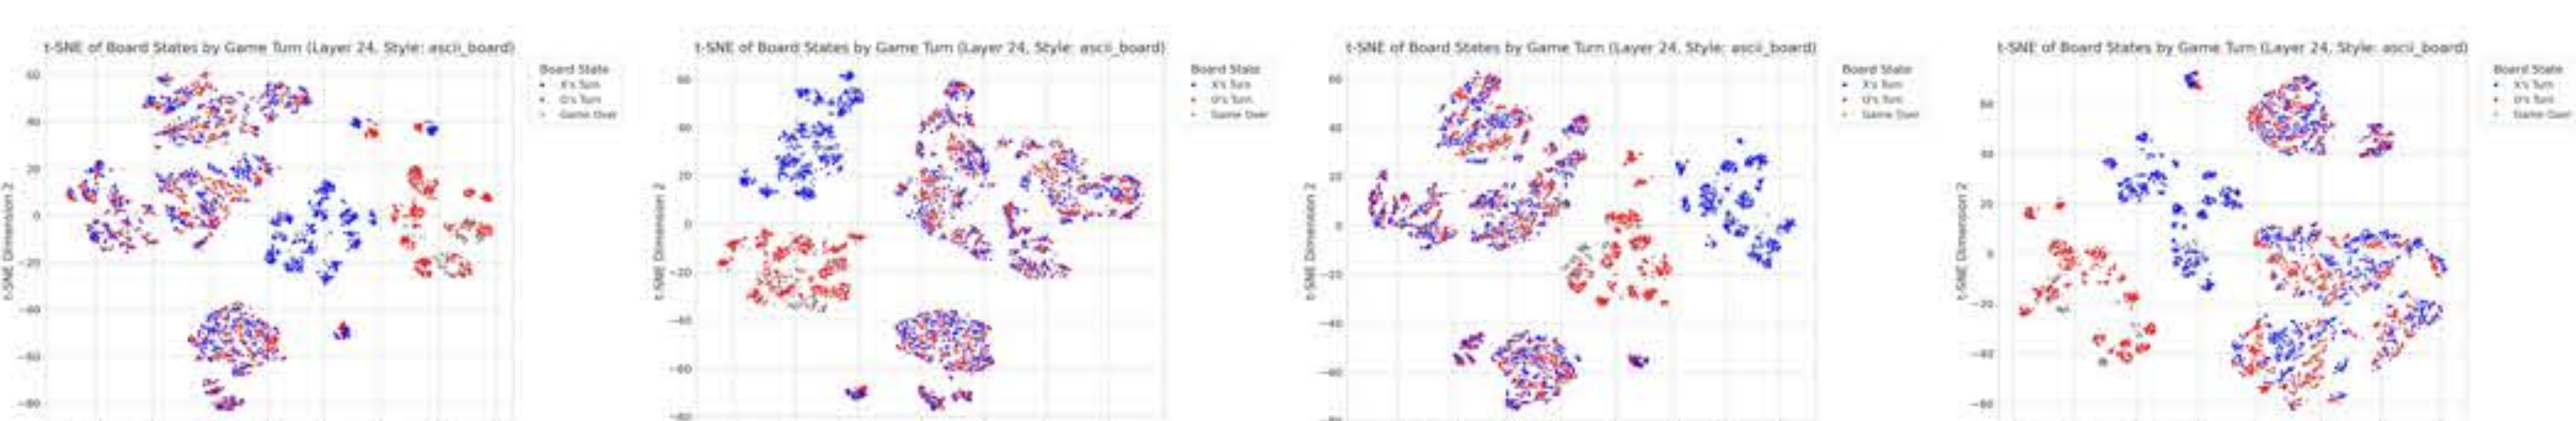

Supplement: supplementary_material [file comparison_viz_hypothesis_game_turn_ascii_board-compressed.pdf › supplemental/Mech Interp Plots/comparison_viz_hypothesis_game_turn_ascii_board-compressed.pdf]
