# Supplementary material
Source: ML conference proceedings conference paper supplement (https://openreview.net/forum?id=DyB3m95eCV)
Supplement: supplementary_material [file comparison_viz_hypothesis_prediction_correctness_ascii_board-compressed.pdf › supplemental/Mech Interp Plots/comparison_viz_hypothesis_prediction_correctness_ascii_board-compressed.pdf]

viz hypothesis prediction correctness ascii board

|          | GRPO<br>Best Move (Base)<br>Ckpt 600                                                                                        | GRPO<br>Best Move (Base)<br>Ckpt 1200                                                                                              |
|----------|-----------------------------------------------------------------------------------------------------------------------------|------------------------------------------------------------------------------------------------------------------------------------|
| Layer 4  | <div><div>Qwen2.5 1.5B Instruct</div></div> | <div><div>GRPO<br/>Best Move (Base)</div></div> |
| Layer 8  | <div></div>                                | <div></div>                                    |
| Layer 12 | <div></div>                               | <div></div>                                   |
| Layer 13 | <div></div>                               | <div></div>                                   |
| Layer 14 | <div></div>                               | <div></div>                                   |
| Layer 15 | <div></div>                               | <div></div>                                   |
| Layer 16 | <div></div>                               | <div></div>                                   |
| Layer 17 | <div></div>                               | <div></div>                                   |
| Layer 18 | <div></div>                               | <div></div>                                   |
| Layer 20 | <div></div>                               | <div></div>                                   |
| Layer 24 | <div></div>                               | <div></div>                                   |
