# Supplementary material
Source: ML conference proceedings conference paper supplement (https://openreview.net/forum?id=DyB3m95eCV)
Supplement: supplementary_material [file comparison_viz_hypothesis_prediction_correctness_text_instruction-compressed.pdf › supplemental/Mech Interp Plots/comparison_viz_hypothesis_prediction_correctness_text_instruction-compressed.pdf]

viz hypothesis prediction correctness text instruction

|          | GRPO<br>Best Move (Base)<br>Ckpt 600                                               | GRPO<br>Best Move (Base)<br>Ckpt 1200                                                 |
|----------|------------------------------------------------------------------------------------|---------------------------------------------------------------------------------------|
| Layer 4  |    |    |
| Layer 8  |   |   |
| Layer 12 |  |  |
| Layer 13 |  |  |
| Layer 14 |  |  |
| Layer 15 |  |  |
| Layer 16 |  |  |
| Layer 17 |  |  |
| Layer 18 |  |  |
| Layer 20 |  |  |
| Layer 24 |  |  |
