# Supplementary material
Source: ML conference proceedings conference paper supplement (https://openreview.net/forum?id=DyB3m95eCV)
Supplement: supplementary_material [file comparison_viz_illegal_dominant_pattern_clusters_ascii_board-compressed.pdf › supplemental/Mech Interp Plots/comparison_viz_illegal_dominant_pattern_clusters_ascii_board-compressed.pdf]

viz illegal dominant pattern clusters ascii board

|          | Qwen2.5 1.5B Instruct                                                               | GRPO<br>Best Move (Base) |
|----------|-------------------------------------------------------------------------------------|--------------------------|
| Layer 4  | Image not found                                                                     | Image not found          |
| Layer 8  | Image not found                                                                     | Image not found          |
| Layer 12 | Image not found                                                                     | Image not found          |
| Layer 13 | Image not found                                                                     | Image not found          |
| Layer 14 | 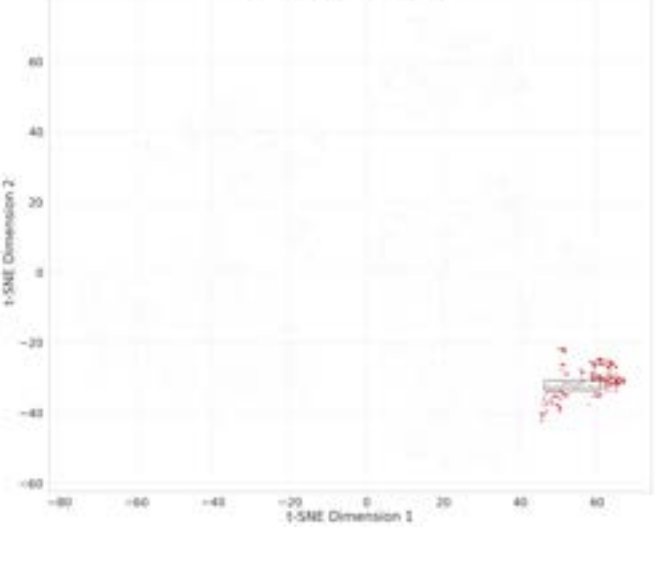 | Image not found          |
| Layer 15 | Image not found                                                                     | Image not found          |
| Layer 16 | Image not found                                                                     | Image not found          |
| Layer 17 | Image not found                                                                     | Image not found          |
| Layer 18 | Image not found                                                                     | Image not found          |
| Layer 20 | Image not found                                                                     | Image not found          |
| Layer 24 | Image not found                                                                     | Image not found          |
