# Supplementary material
Source: ML conference proceedings conference paper supplement (https://openreview.net/forum?id=DyB3m95eCV)
Supplement: supplementary_material [file comparison_viz_kmeans_dominant_line_patterns_text_instruction-compressed.pdf › supplemental/Mech Interp Plots/comparison_viz_kmeans_dominant_line_patterns_text_instruction-compressed.pdf]

Layer 24
