# Supplementary material
Source: ML conference proceedings conference paper supplement (https://openreview.net/forum?id=DyB3m95eCV)

## er 24

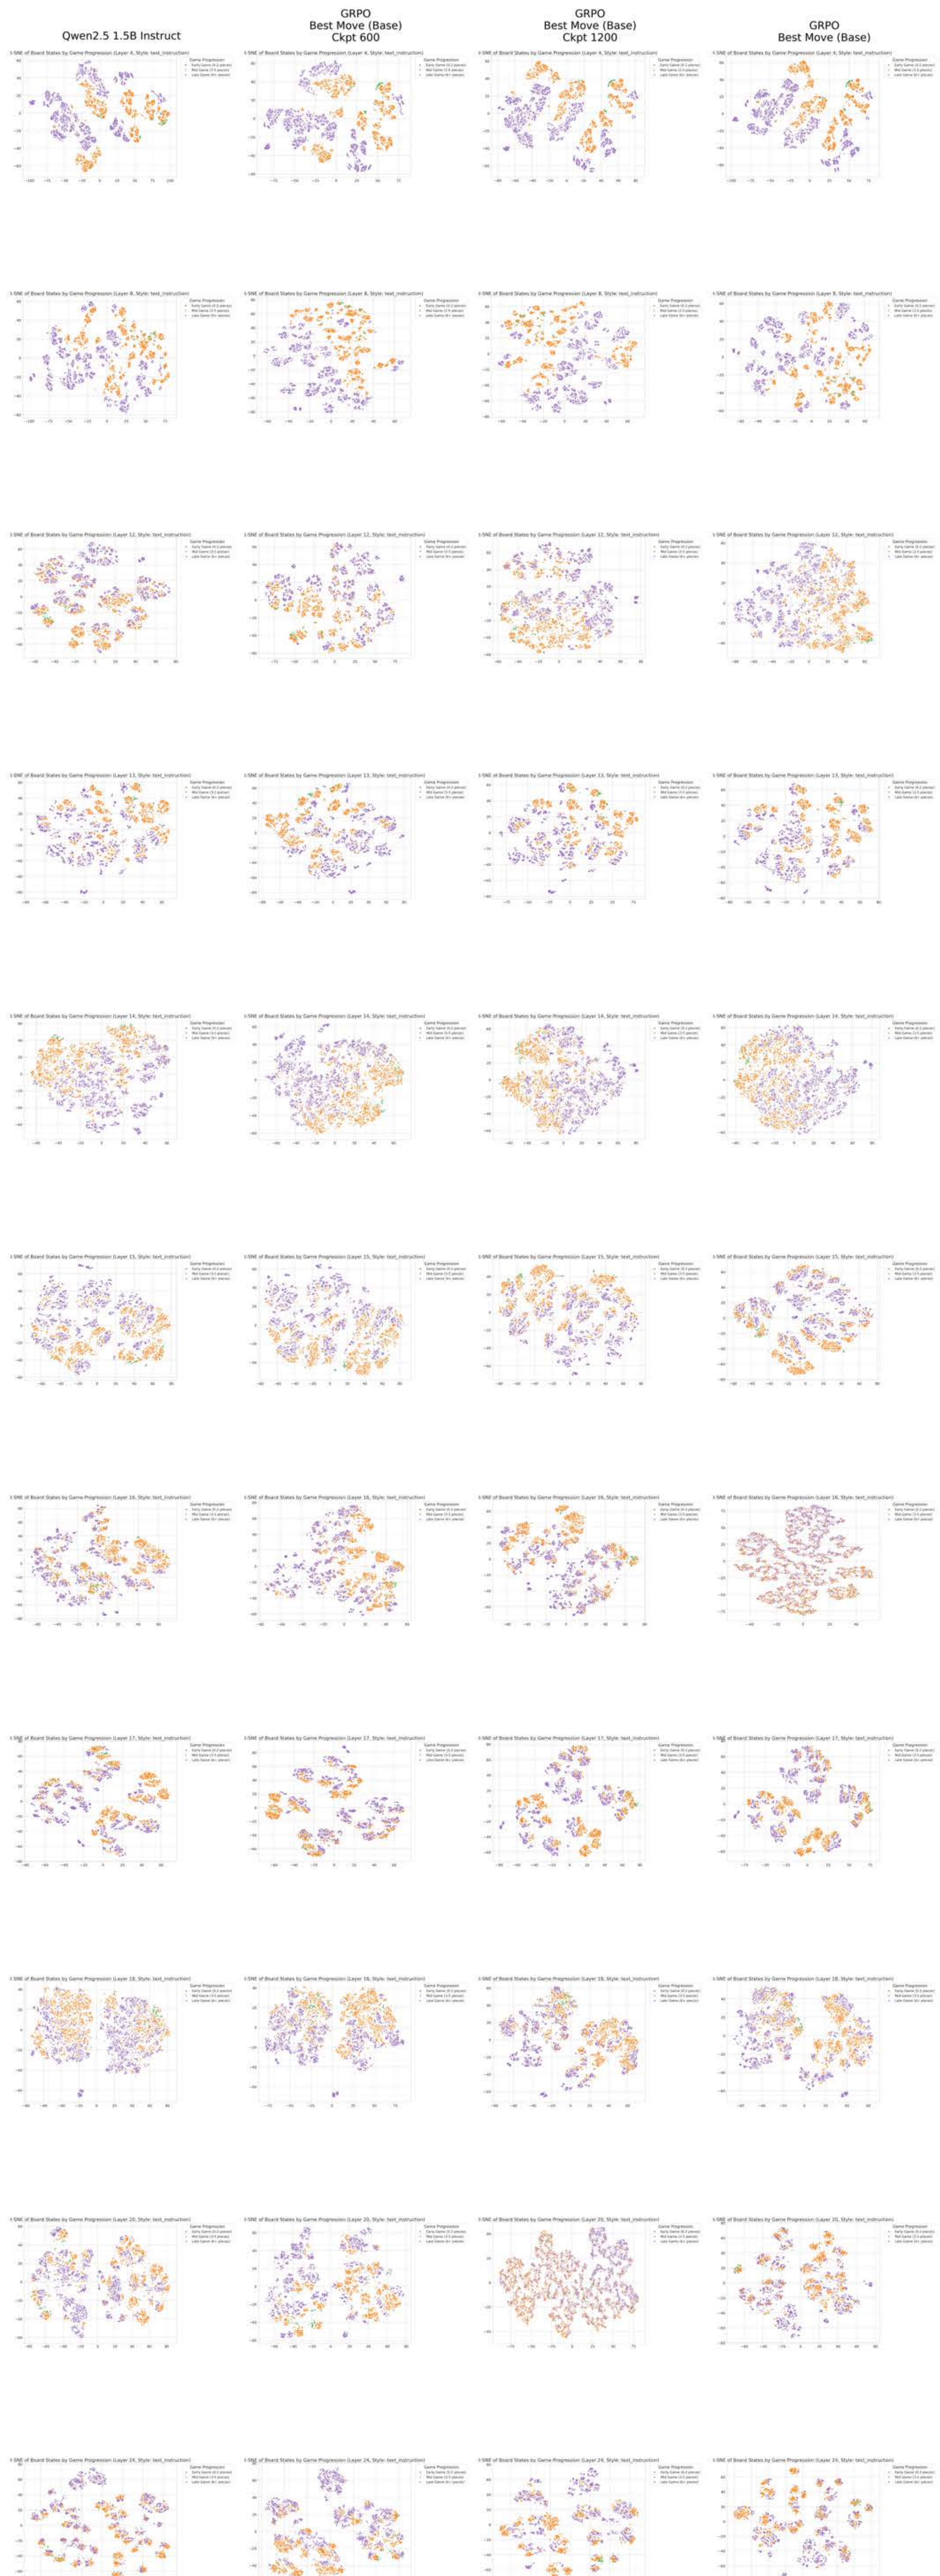

Supplement: supplementary_material [file comparison_viz_hypothesis_game_progression_text_instruction-compressed.pdf › supplemental/Mech Interp Plots/comparison_viz_hypothesis_game_progression_text_instruction-compressed.pdf]

# viz hypothesis prediction correctness text instruction

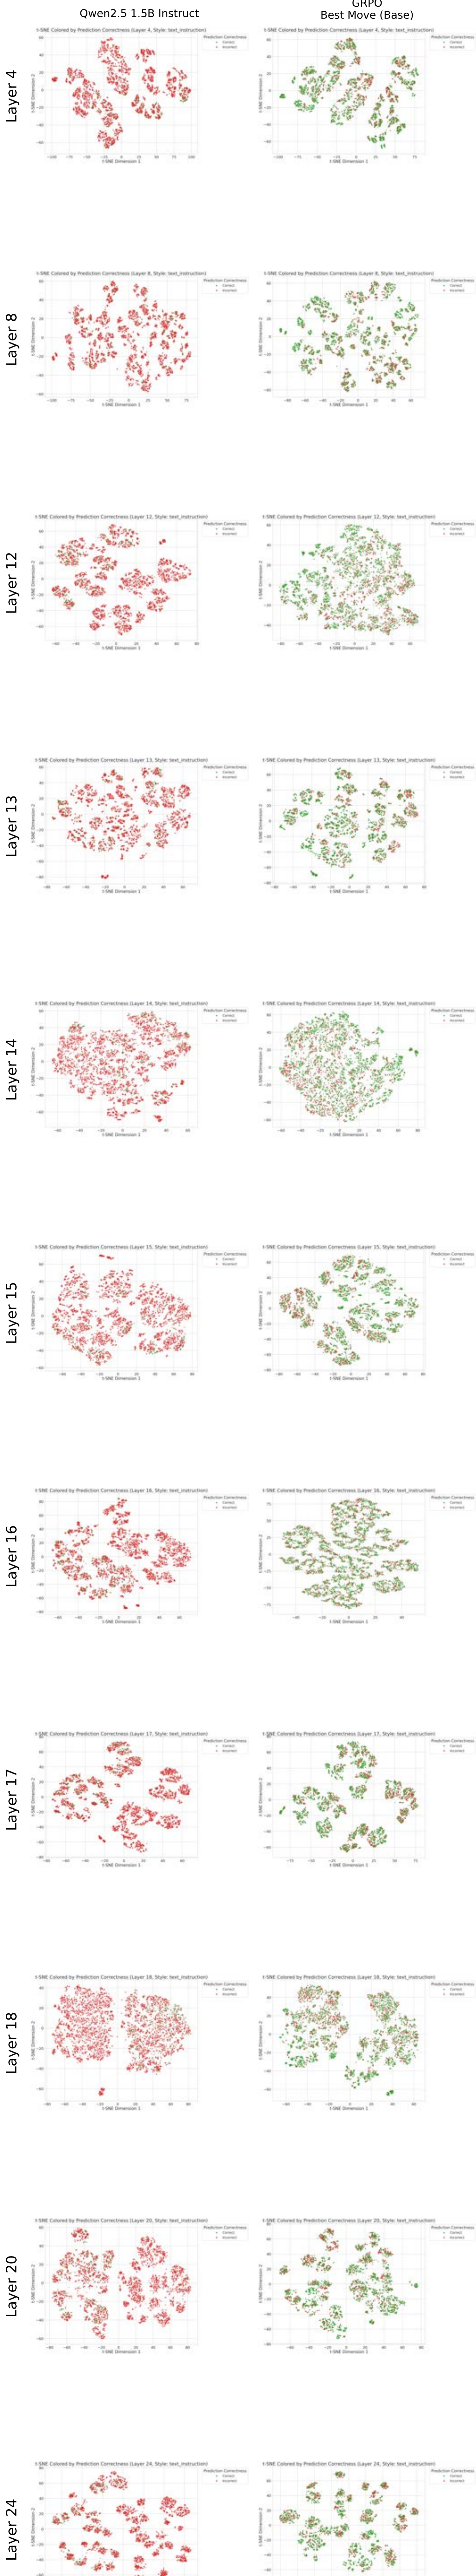

Supplement: supplementary_material [file comparison_viz_hypothesis_prediction_correctness_text_instruction-compressed (1).pdf › supplemental/Mech Interp Plots/comparison_viz_hypothesis_prediction_correctness_text_instruction-compressed (1).pdf]

viz illegal dominant pattern clusters text instruction

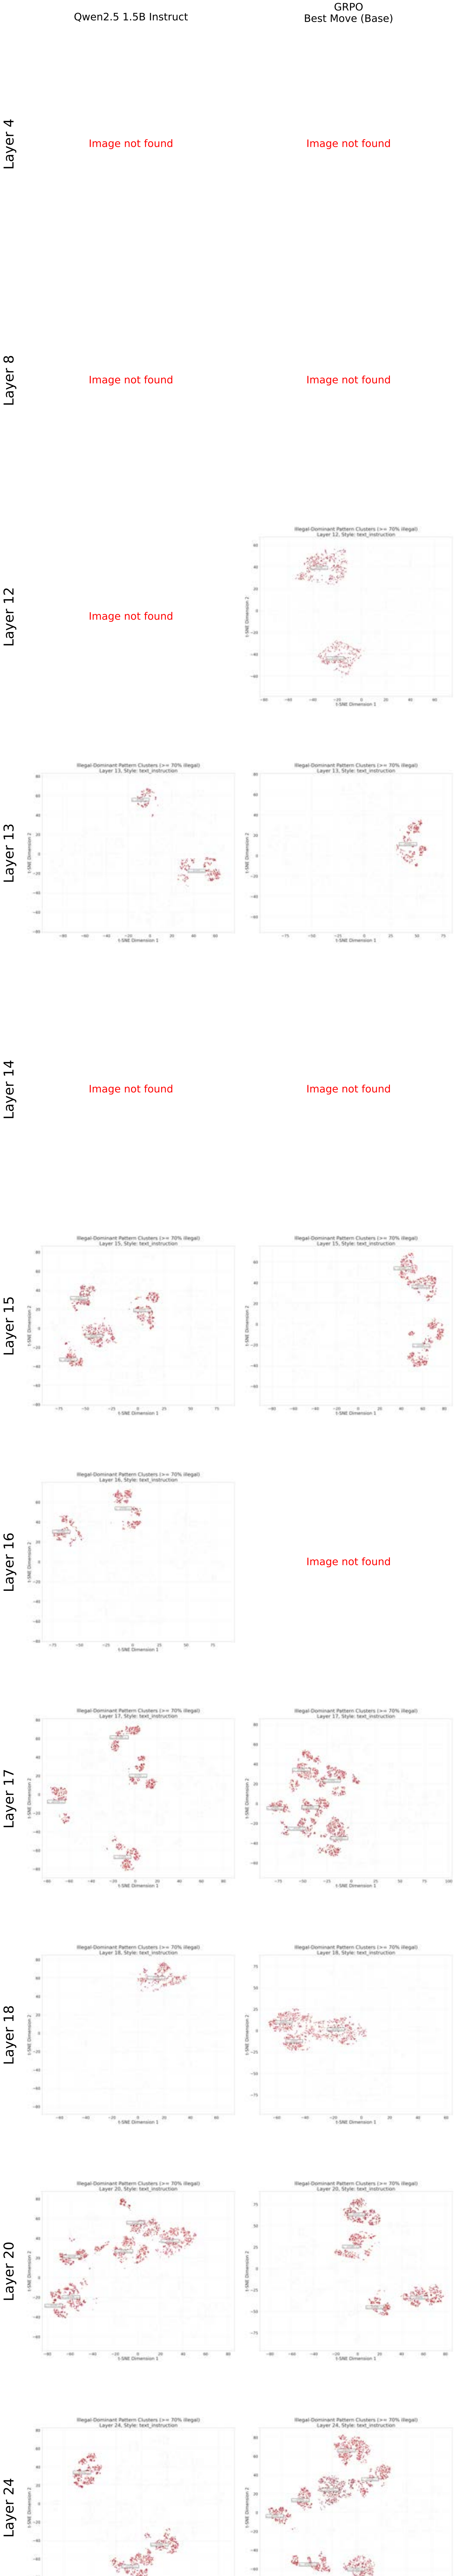

Supplement: supplementary_material [file comparison_viz_illegal_dominant_pattern_clusters_text_instruction-compressed.pdf › supplemental/Mech Interp Plots/comparison_viz_illegal_dominant_pattern_clusters_text_instruction-compressed.pdf]

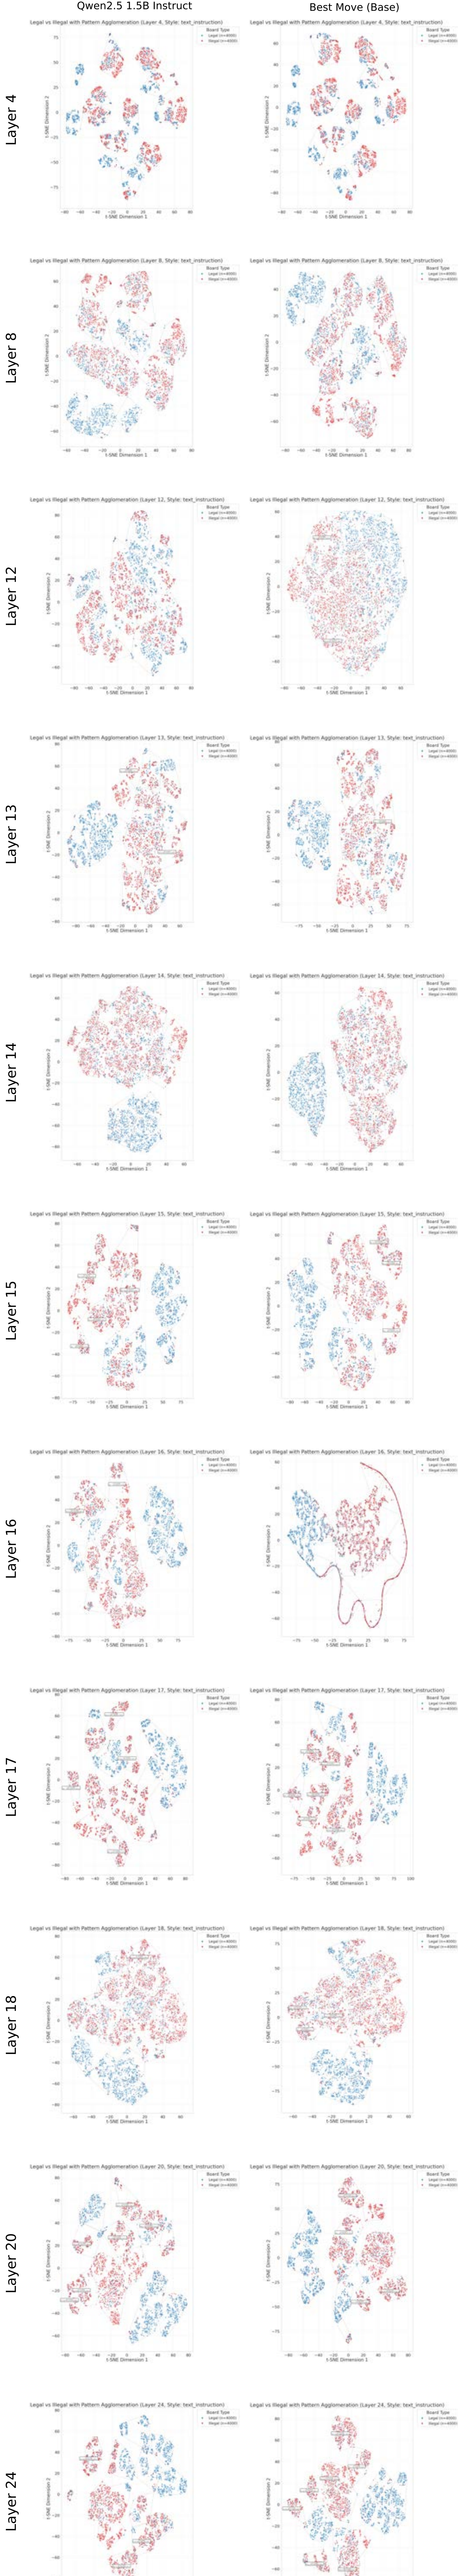

Supplement: supplementary_material [file comparison_viz_illegal_legal_pattern_agglomeration_text_instruction-compressed.pdf › supplemental/Mech Interp Plots/comparison_viz_illegal_legal_pattern_agglomeration_text_instruction-compressed.pdf]

# viz illegal merge line purity ascii board

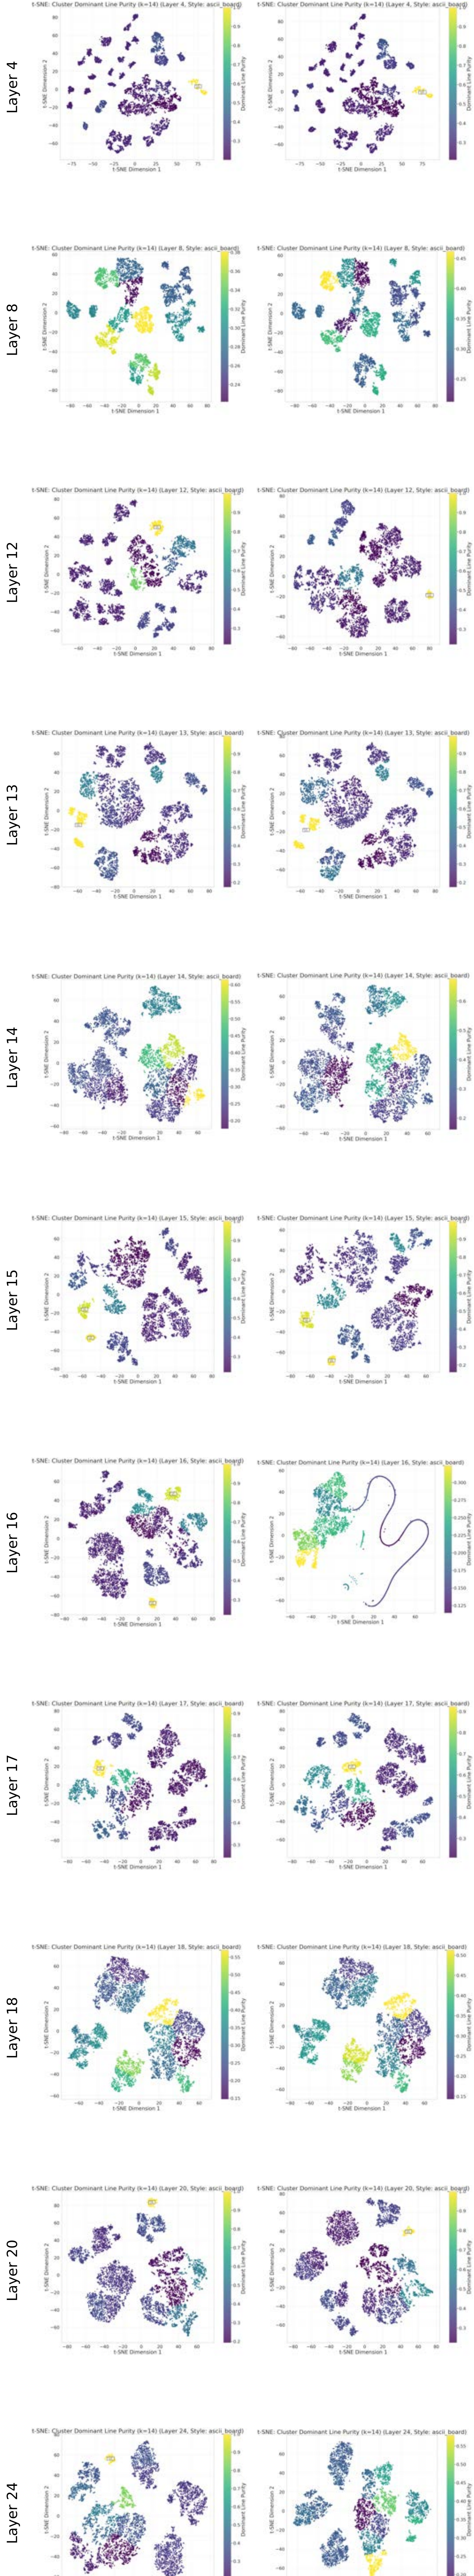

Supplement: supplementary_material [file comparison_viz_illegal_merge_line_purity_ascii_board-compressed.pdf › supplemental/Mech Interp Plots/comparison_viz_illegal_merge_line_purity_ascii_board-compressed.pdf]

# viz illegal reason combos text instruction

Layer 4

Qwen2.5 1.5B Instruct

GRPO  
Best Move (Base)

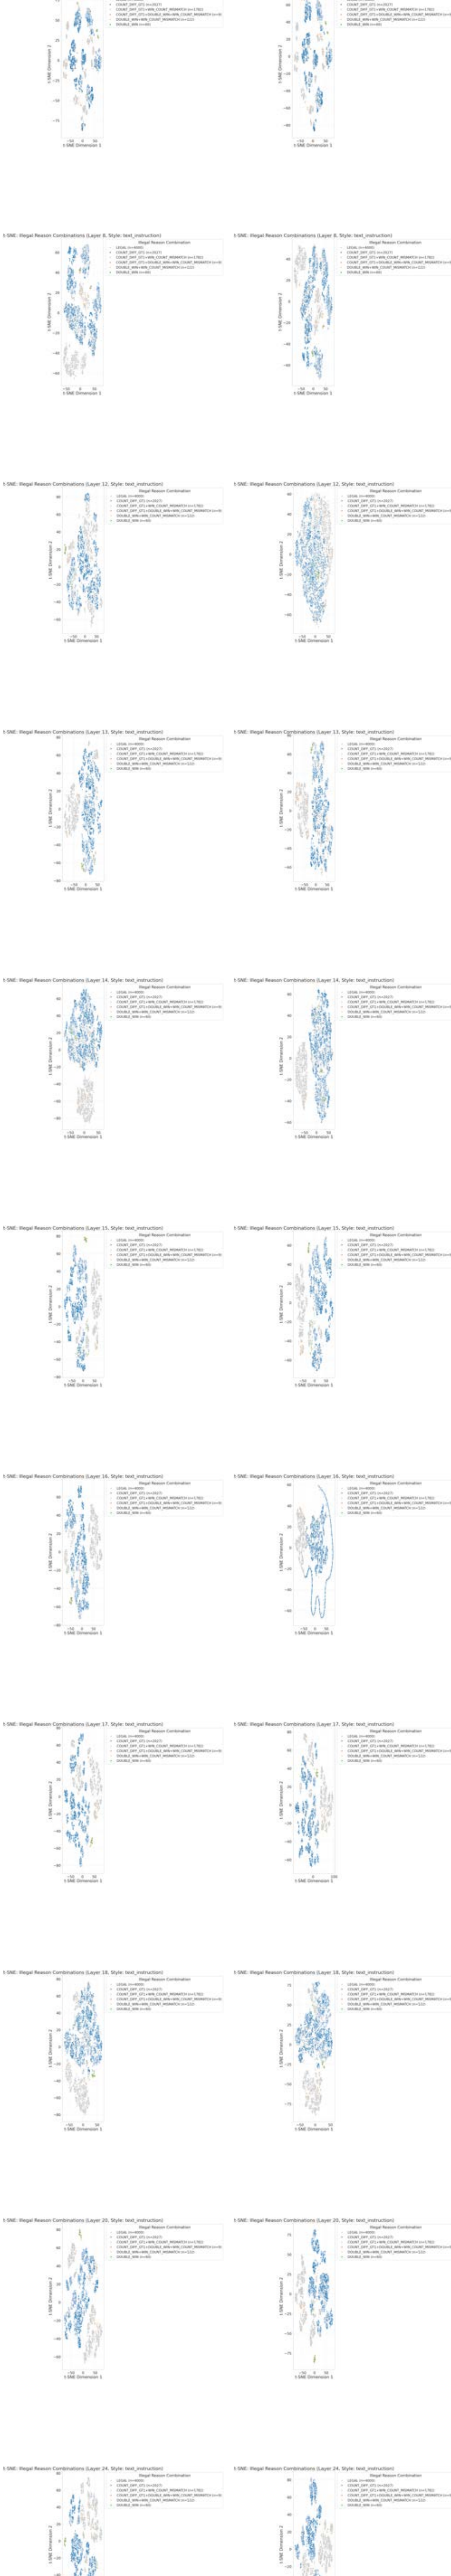

Layer 24

Supplement: supplementary_material [file comparison_viz_illegal_reason_combos_text_instruction-compressed.pdf › supplemental/Mech Interp Plots/comparison_viz_illegal_reason_combos_text_instruction-compressed.pdf]
